# Supplementary material for: Natural History of a Satellite DNA Family: From the Ancestral Genome Component to Species-Specific Sequences, Concerted and Non-Concerted Evolution
Source: MDPI journal article supplement (doi:10.3390/ijms20051201), 2019-03-09

## Supplementary Data 1

Occurrence of CficCI-61-40 satDNA family in genomes of *Chenopodium* diploid species revealed by RepeatExplorer pipeline and formations of high order repeat (HOR) units

### Species with uniform CficCI-61-40 satDNA family tandem repeat arrays

#### *C. ficifolium*

Cluster 61

>CL61Contig25 (4116-54.1-222672)

AATTGAATCAAATGGAATACAAACACATTCAAACAAAGCTAATTGATTCAAATGAAAGTCAAACACATTGAACTAA  
AGCTTTATCAATAAAATGAAAGTCAAACACCTTCAAACAAAGTTTTTTGAATTAGAGGAAAGTCAAACACATTTAA  
ACAAAGCTTTTTGAATCAAATGAAAGTCAAACACATTCAAACAAATCTTTTTCAATCAAATGAAAGTCAAATGTAT  
TAAAAGAAGCTAAGTGAATCAAATGAAAGTCGAAGACATTTAAACAAAGCTTTTTGAAGCAAAGCAAAGTCAAAC  
ACATTCAAACAAAGCTTTTAGAATCAAATGAAAGTCAAACACATTCAAACAAATCTTTTTGAATCAAAAGAAAGTC  
AAACATATTCAAACAAAGCTTTTTGAATCAAATGAAAGTCAAACACATTAAACAAAGCATTTTAAACCAAAGAA  
AATCAAACACATTCAAACAAAGCTTTTTGAATTGAATGAAAGTCAAATGCATTCAACGAAGCTAATTGAATCAAAT  
GAAAGTCAAACACATTCAAACAAAGCTTTTTGAATCGAAAGAAAGTCAAACACATTCAAACAAAGCTTTTTGAATC  
AAATGAAAGTCAAACACATTCAAACAAAGCTTTTTGAATCAAAAGAAAGTCAAACACATTCAAACAAAGCTTTTTG  
AATCAAAATAAAGTCAAACACATTCAAACAAAGCTTTTTGAATCAAATGAAAGTCAAACACATTCAAACAAAGCTT  
TTTGAATCAAATGAAAGTCAAACACATTCAAACAAATCTTTTTGAATCAAAATAAAGTCAAACACATTCAAACAAAG  
CTTTTTGAATCAAATGAAAGTCAAACACATTCAAACAAAGCTTTTTGAATCAAATGAAAGTCAAACACATTCAAACA  
AAGCTTTTTGAATCAAATGAAAGTCAAACACATTCAAACAAAGCTTTTTGAATCAAATGAAAGTCAAACACATTCA  
AACAAAGCTTTTTGAATCAAATGAAAGTCAAACACATTCAAACAAAGCTTTTTGAATCAAATGAAAGTCAAACACA  
TTCAAACAAAGCTTTTTGAATCAAATGAAAGTCAAACACATTCAAACAAATCTTTTAAATCAAATGAAAGTCAAAC  
ACATTCAAACATAGCTTTTTGAATCAAATGAAAGTCAAACACATTCAAACAAAGCTTTTTGAATCAAATGAAAGTCA  
AACACATTCAAACAAAGCTTTTTGAATCAAATGAAAGTCAAACACATTCAAACAATTCTTTTTGAATCAAAATAAAG  
TAAACACATTCAAACAAAGCTTTTTGAATCAAAAGAAAGTCAAACACATTCAAACAAAGCTTTTTGAATCAAATG  
AAAGTCAAACACATTCAAACAAAGCTTTTTGAATCAAAAGAAAGTCAAACACATTCAAACAAAGCTTTTTGAATCA  
AATGAAAGTCAAACACATTCAAACAAATCTTTTAAATCAAATGAAAGTCAAACACATTCAAACATAGCTTTTTGAA  
TCAAATGAAAGTCAAACACATTCAAACAAAGCTTTTTGAATCAAATGAAAGTCAAACACATTCAAACAAATCTTTTT  
AGATCGAAATACAGTCAAACACATTCAAACAAAGCTTTATGAATCAAAAGAAAGTCAAACACATTCAAACAATTCT

TTTTGAATCGAAAAAAGTAAAAACACATTCAAACAAAGCTTTTTGAATCAAAAGAAAGTCAAACACATTCAAACA  
AAGCTTTTTGAATCAAATGAAAGTCAAACACATTCAAACAAAGCTTTTTGAATCAAAATAAAGTCAAAGACATTCA  
AACATAGCTTTTTGAATCAAATGAAAGTGAAACACATTCAAACAAAGCTTTTTGAATCAAATAAGAGTCAAACACT  
TTCAAACAAATCTCTTTAGATCAAATTACAGTCAAACACATTCAAACAAAGCTTTATGAATCAAAATAAAGTCAAAC  
ACATTCTAACAATTCTTTTTAAATCGAAAAAAAATAAAACACATTTAAACAAAGTTTTTTGAATCAAAAGAAAGTCA  
AACACATTCAAACAAATCTTTTTGAATCAAATAAAAGTCAAACACATTCAAACAAATATTTTTGAATCATATGAAAG  
TCAAACACATTCAAACATAGCTTTTTGAATCAAATGAAAGTCAAACACATTCAAACAAAGCTTTTTGAATCAAATGA  
AAGTCAAACACATTCAAACAAATCTTTTTGAATCGAAATAAAGTCAAACACATTCAAACAAAGCTTTTTGAATCAAA  
TGAAAGTCAAACACATTCAAACAAAGCTTTTTGAATCAAATGAAAGTCAAACACATTCAAATAAATCTTTTTGAATC  
GAAATAAAGTCAAACACATTCAAACAAAGCTTTTTGAATCAAATGAAAGTCAAACACATTCAAACAAAGCTTTTTG  
AATCAAATGAAAGTTAAACACATTCAAACAAAGCTTTTTGAATCAAATGAAAGTCAAACACATTCAAACAACTAACCTTT  
TTCGATCGAAATACAGTCAAACACATTCAAAAAAAGCTTAATAAATCAAAAGAAAGTCAAACACATTCAATAAATG  
TTTCTGAATAACAAGAAAGTCAAACACATTTAAACAAAGCTTTTTAATCAAATGAAAGTCAAACATTTAAACAAAT  
CTTTTTAAATCAAATGAAAGTCAAACACATACAAACATAGCTTTTTGAATCAAATGAAAGTCAAACACATTCAAACA  
ATGCTTTTTGAATTAAATGAAAGACAAAAACATTCAAAAAAATCTTTTTGAATCGAAATAAAGTCTAACACATTCAA  
ACAAAGCTTTTTGAATCAAATAAAAGTCAAACACATTCAAACAAATCTTTTTAGATCAAAATACAGTCAAACACATT  
CAAACAAATCTTTTTGAATCGAAATAAAGTCAAACACATTTAAACAAAGCTTTTTGAATCAAAAGAAAGTCAAACA  
CATTCAAACAAATCTTTTTAAATCAAATGAAAGTCAAACACATTCAAAAAAAGCTTTTTGAATCAAATGAAATCAA  
ATACATTCAAACAATTCTTTTTAAATCGAAAAAAGTCAAACCCATTCAAACAAAGCCTTTTGAATCAAAATAAAGT  
AAAATACATTCAATTATAGCTTTTTGAATCAAATGAAAGTCAAACACATTCAAAAAAATTTTTTTAATCGAAATAA  
AGTAAACAAATTCAAACAAAGCTTTTTGAATTAAAGAAAGTCAAACACATTCAAATAAAGGGTTTTGAACCAAA  
AAAAAGTCAAGCACATTCAAATAAAGCTTTTTAAATCAAAAAAAAAGTAAACACATACAAACAAATCTTTTTAAAT  
CAAATGAAAGTCAAACACATTCAAACAAATCTTTTTGAATCAAATGAAAGTCAAACACATTCAAACAAAGCTTTTTG  
AATCAAATGAAAGTCAAAGACATTCATACAAATCTTTTTGAATCAAATAAAGTCAAACACATTCAAAAAAATCTTT  
TTGATTGAAATAAAGTCAAACACATTCAAACAAAACCTTTTTGAATCAAATGAAAGTCAAACACATTCAAGCAAAG  
ATTTTTGAATCAAATGAAAGAATAACACATTCAAATAAATCTTTTTTATCGAAGTAAAGTAAACACATTCAAACA  
AAGCTTTATGAATCAAATGAAAGTTAAACACATTCAACAAAGCATTTTGAATCAAATGAAAGTCAAACACATTCAA  
ACAAATCTCTTTAGATCAAAATACAGTCACACACATTCAAACAAAGCTTTATGAATCAAAAGAAAGTCAAACACATT  
CTAACAATTCTTTTTGAATCGAAAAAAGTAAACACATTCAAACAAAGTTTTTTAATCAAAAGAAAGTCAAACAC  
ATTCAAACAAAGCTTTTTGAATCAAATGAAAGTCAAACACATTCAAACAAATATTTTTAAATCAAATGAAAGTCAA  
CACATTCAAACATAGCTTTTTGAATCAAATGAAAGTCAAACACATTCAAACAAAGCTTTTTGAATCAAATGAAAGTC  
AAACACATTCAAACAAAGCTTTTTGAATCAAATGAAAGTTCACATTCAACAAAGCTTTTT

Table of detected monomers

| Indices | Period<br>Size | Copy<br>Number | Consensus<br>Size | Percent<br>Matches | Percent<br>Indels | Score | A  | C  | G | T  | Entropy<br>(0-2) |
|---------|----------------|----------------|-------------------|--------------------|-------------------|-------|----|----|---|----|------------------|
| 3--4096 | 40             | 102.4          | 40                | 87                 | 3                 | 5732  | 48 | 16 | 8 | 25 | 1.75             |

Consensus pattern (40 bp):

TTGAATCAAATGAAAGTCAAACACATTCAAACAAAGCTTT

BLAST alignments:

Chenopodium quinoa clone 12-13p repeat region sequence. Sequence ID: [HM641822.1](#)

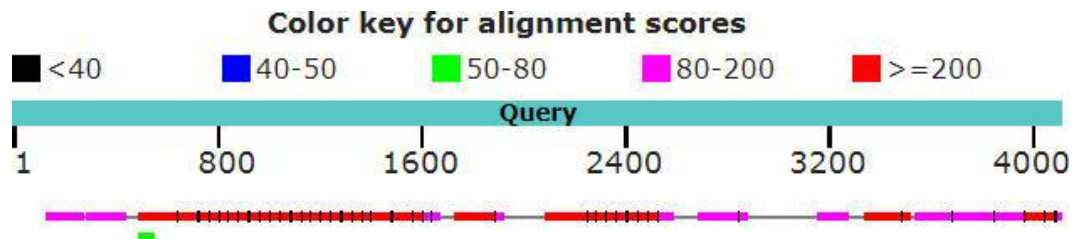

### *C. pamiricum*

#### CLUSTER 52

>CL52Contig43 (6269-81.2-508851)

AATAAAATGAAAGTCAAACACATTCAAACAAAGCTTTTGAATCAAATGAAAGTCAAAGACATTCAAACAAAGATT  
TTAGTCAAATGAAAGTCAAACACATTAAACAAAGCTTTTGAATCAAATGAAAGTCAAACACATTCAAACAAAG  
CTTTTTAATCAAATGATGTCAAACACATTCAAACAAAGCATTTTGAATCAAATGAAAGTCAAACACATTCAAACAA  
AGCTTTTTGAATCAAATGAAAGTCAAACACATTCAAACAAAGCTTTTTGAATCAAATGAAAGTCAAACACATTCAA  
ACAAAGCTTTTTGAATCAAATGAAAGTCAAACACATTCAAACAAAGCTTTTGAATCAAATGAAAGTCAAACACAT  
TCAAACAAAGCTTTTTGAATCAAATGAAAGTCAAACACATTCAAACAAAGCTTTTTGAATCAAATGAAAGTCAAAC  
ACATTCAAACAAAGCTTTTTGAATCAAATGAAAGTCAAACACATTCAAACAAAGCTTTTTGAATCAAATGAAAGTC  
AAACACATTCAAACAAAGCTTTTTGAATCAAATGAAAGTCAAACACATTCAAACAAAGCTTTTTGAATCAAATGAA  
AGTCAAACACATTCAAACAAAGCTTTTTGAATCAAATGAAAGTCAAACACATTCAAACAAAGCTTTTTGAATCAAAT  
GAAAGTCAAACACATTCAAACAAAGCTTTTTGAATCAAATGAAGTCAAACACATTCAAACAAAGCTTTTTGAATCA  
AATGAAAGTCAAACACATTCAAACAAAGCTTTTTGAATCAAATGAAGTCAAACACATTCAAACAAAGCTTATTCAA  
TCAAATGAAAGTCAAACACATTCAAACAAAGCTTTTTGAATCAAATGAAAGTCAAACACATTCAAACAAAGCTTTTT



AATCAAATGAAAGTCAAACACATTCAAACAAAGCTTTTTGAATCAAATGAAAGTCAAACACATTCAAACAAAGCTT  
TTTGAATCAAATGAAAGTCAAACACATTCAAACAAAGCTTTTTGAATCAAATGAAAGTCAAACACATTCAAACAA  
GCTTTTTGAATCAAATGAAAGTCAAACACATTCAAACAAAGCTTTTTGAATCAAATGAAAGTCAAACACATTCAAAC  
AAAGCTTTTTGAATCAAATGAAAGTCAAACACATTCAAACAAAGCTTTTTGAATCAAATGAAAGTCAAACACATTC  
AAACAAAGCTTTTTGAATCAAATGAAAGTCAAACACATTCAAACAAAGCTTTTTGAATCAAATGAAAGTCAAACAC  
ATTCAAACAAAGCTTTTTGAATCAAATGAAAGTCAAACACATTCAAACAAAGCTTTTGAATCAATGAAAGTTAAA  
CACATTCAAACAAAGCTTTTTGAATCAAATGAAAGTTAAACACATTCAATCAAAGCTTTTTGAATCAAATGAAAGTG  
AAATGTATTTCAAAAGCTAATTGATACTTTCAAACAAATTTTTGAATCAAATGAAAGTCAAACACATTCAAACAA  
AGCTTTTTGAATCAAATGAAAGTCAAACACATTCAAACAAAGCTTTTTGAATCAAATGAAAGTCAAACACATTCAA  
ACAAAGCTTTTTGAATCAAATGAAAGTCAAACACATTCAAACAAAGCTTTTTGAATCAAATGAAAGTCAAACACAT  
TCAAACAAAGCTTTTTGAATCAAATGAAAGTCAAACACATTCAAACAAAGCTTTTTGAATCAAATGAAAGTCAAAC  
ACATTCAAACAAAGCTTTTTGAATCAAATGAAAGTCAAACACATTCAAACAAAGCTTTTTGAATCAAATGAAAGTCA  
AACACATTCAAACAAAGCTTTTTGAATCAAATGAAAGTCAAACACATTCAAACAAAGCTTTTTGAATCAAATGAAAG  
GTCAAACACATTCAAACAAAGCTTTTTGAATCAAATGAAAGTCAAACACATTCAAACAAAGCTTTTTGAATCAAATG  
AAAGTCAAACACATTCAAACAAAGCTTTTTGAATCAAATGAAAGTCAAACACATTCAAACAAAGCTTTTTGAATCA  
AATGAAAGTCAAACACATTCAAACAAAGCTTTTGAATCAATGAAAGTTAAACACATTAAACAAAGCTTTTTGAAT  
CAAATGAAAGTCAAACACATTCAATCAAAGGTTTTGAATCAAATGAAAGTCAAACACATTCAAACAAAGCTTTTT  
GAATCAAATGAAAGTCAAACACATTCAAACAAAGCTTTTTGAATCAAATGAAAGTCAAACACATTCAAACAAAGCT  
TTTTGAATCAAATGAAAGTCAAACACATTCAAACAAAGCTTTTTGAATCAAATGAAAGTCAAACACATTCAAACAA  
AGCTTTTGAATCAATGAAAGTCAAACACATTCAAACAAAGCTTTTTGAATCAAATGAAAGTCAAACACATTCAAT  
CAAAGCTTTTTGAATCAAATGAAAGTCAAACACATTCAAACAAAGCTTTTTGAATCAAATGAAAGTCAAACACATTC  
AAACAAAGCTTTTTGAATCAAATGAAAGTCAAACACATTCAAACAAAGCTTTTTGAATCAAATGAAAGTCAAACAC  
ATTCAAACAAAGCTTTTTGAATCAAATGAAAGTCAAACACATTCAAACAAAGCTTTTTGAATCAAATGAAAGTCAA  
ACACATTCAAACAAAGCTTTTTGAATCAAATGAAAGTCAAACACATTCAAACAAAGCTTTTTGAATCAAATGAAAG  
TCAAACACATTCAAACAAAGCTTTTTGAATCAAATGAAAGTCAAACACATTCAAACAAAGCTTTTTGAATCAAATGA  
AAGTCAAACACATTCAAACAAAGCTTTTTGAATCAAATGAAAGTCAAACACATTCAAACAAAGCTTTTTGAATCAA  
ATGAAAGTCAAATGCATTTCAAAAGCTAATTGATACAAAAGAAAGTCAAACACATTCAAACAAAGCTTTTTGAAT  
CAAATGAAAGTCAAACACATTCAAACAAAGCTTTTTGAATCAAATGAAAGTCAAACACATTCAAACAAAGCTAATTG  
AATCAAATGAAAGTCAAACACATTCAAACAAAGCTTTTTGAATCAAATGAAAGTCAAACACATTCAAACAAAGCTT  
TTTGAATCAAATGAAAGTCAAACACATTCAAACAAAGCTTTTTGAATCAAATGAAAGTCAAACACATTCAAACAA  
GCTTTTTGAATCAAATGAAAGTCAAATACATTCAAACAAAGCTTTTTGAATCAAATGAAAGTCAAACACATTCAAAC  
AAAGCTTTTTGAATCAAATGAAAGTCAAACACATTCAAACAAAGCTTTTTGAATCAAATGAAAGTCAAATGCATTT

ACAAAGCTAATTGATACAAATGAAAGTTAAACACATTCAAACAAAGCTTTTTGAATCAAATGAAGTCAAATACATT  
 CAAACAAAGCTTTTTGAATTAAATGAAAGTCAAACACATTCAAACAAAGCTTTTTGAATCAAATGAAAGTCAAACA  
 CATTCAAACAAAGCTTTTTGAATCAAATGAAAGTCAAACACATTCAAACAAAGCTTTTTGAATCAAATGAAAGTCA  
 AACACATTCAAACAAAGCTTTTTGAATCAAATGAAAGTCAAATGCATTTCACAAAGCTAATTGATACAAAAGAAAG  
 TCAAACACATTCAAACAAAGCTTTTTGAATCAAATGAAAGTCAAACGTTGTAGCCAAGCCTAACAACTGGTTATG  
 GACATTTCTTTGGTTCAAGACGTAGCATCATGTATTGGTGCTATGCATTCTATCCATGGGCAACAAGATATTCAATC  
 CCTTGAGTTTCTTGTT

Table of detected monomers

| Indices                 | Period<br>Size | Copy<br>Number | Consensus<br>Size | Percent<br>Matches | Percent<br>Indels | Score | A  | C  | G  | T  | Entropy<br>(0-2) |
|-------------------------|----------------|----------------|-------------------|--------------------|-------------------|-------|----|----|----|----|------------------|
| <a href="#">5--6145</a> | 40             | 153.4          | 40                | 96                 | 1                 | 11245 | 47 | 17 | 10 | 25 | 1.78             |

Consensus pattern (40 bp):

AAATGAAAGTCAAACACATTCAAACAAAGCTTTTTGAATC

Chenopodium quinoa clone 12-13p repeat region sequence Sequence ID: [HM641822.1](#)

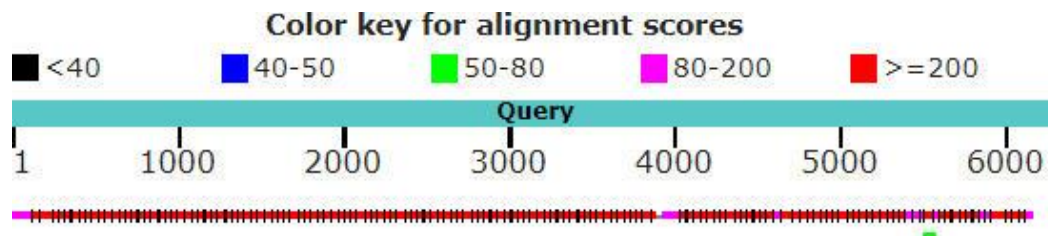

### *C. suecicum*

#### CLUSTER 64

>CL64Contig159 (3299-17.3-57000)

ATTTTCTCGAAAAAGTAAAAACACATTCAAACAATGCTTTTTGAATCAAAGAAAGTCAAACACATTCAAACAAA  
 GTATTTTGAATCAAATGAAAGTCAGACACATTGAAAGCAATCTTTTAATCATATGAAAGTCAAACACATTCAAACA  
 TAGCTTTTTGAATCAAATGAAAGTCAAACACATTTAAACAAAGCTTTTGAATCAAATGAAAGTCAAACACATTCAA  
 CAAATATTTTAAATCATAAGAAAGTCAAACACATTCAAACATAGCTTTTTGAATCAAATGAAAGTCAAACACATTC

AAACAAAGCTTTTTGAATCAAATGAAAGTCAAACACATTCAAACAAATCTTTTTGAATCGAAATAAAGTCAAACAC  
ATTCAAACAAAGCTTTTTGAATCAAATGAAAGTCAAACACATTCAAACAAAGCTTTTTGAATCAAATGAAAGTCAA  
ACACATTCAAACAAAGCTTTTTGAATCAAATGAAAGTCAAACACATTCAAACAAATCTTTTTGAATCGAAATAAAGT  
CAAACACATTCAAACAAAGCTTTTTGAATCAAATGAAAGTCAAACACATTCAAACAAATCTTTTTGAATCGAAATAA  
AAGTCAAACACATTCAAACAAAGCTTTTTGAATCAAATGAAAGTCAAACACATTCAAACAAAGCTTTTTGAATCAA  
ATGAAAGTCAAACACATTCAAACAAAGCTTTTTGAATCAAATGAAAGTCAAACACATTCAAATAAATCTTTTTGAAT  
CAAATGAAAGTCAAACACATTCAAACAAAGCTTTTTGAATCAAATGAAAGTCAAACACATTCAAACAAAGCTTTTT  
GAATCAAATGAAAGTCAAACACATTCAAACAAATCTTTTTAAATCATATGAAAGTCAAACACATTCAAACATAGCTT  
TTAAATCAAATGAAAGTCAAACACATTAAACAAAGCTTTTAGAATCAAATGAAAGTCAAACACATTCAAATAAAT  
CTTTTTGAATTGAAATAAAGTCAAACACATTCAAACAAAGCTTTTTGAATCAAATAAAAGTCAAACACATTCAAACA  
AAGCTTTTTGAATCAAATGAAAGTCAAACACATTCAAACAAAGCTTTTTGAATCAAATGAAAGTCAAACACATTAA  
ACAAAGCTTTTTGAATCAAATGAAAGTAAACACATTCAAACAAGCTTTTTGAATCAAATGAAAGTCAAACACATT  
CAAACAAATCTTCAAATCAAATGAAAGTCAAACACAAACAAGCATAGCTTTTTGAATCAAATGAAAGTCAAACA  
CATTCAAACAAAGCTTTTTGAATCAATTGAAAGTCAAACACATTGAAACAAATCTATTGGATCGAAATACAGTCAA  
ACACATTCAAACATAGCTTTTTGAATCTAATGAATGTCAAATACATTCAAACAAAGCTTTTTGAATCAAATGAAAT  
CAAACACATTCAAATAAATCTTTTTGAATCGAATGAAAGTCAAACACATTCAAACAAAACCTTTTAGATCGAAATTC  
AGTCAAACAAATTCAAACAAAGCTTTATGAATCAAAAGAAAGTCAAACACATTCAAAAAAGCTTTTTGAATCAAA  
AAAAGTCAAACACATTCAAACAATTTTATTTGAAACGAAAAAAGAAAAACACATTCAAGCAAAGGTTTTTGAAT  
CAAAAGAAAGTCAAACACAATTAAACAAAGTTTTATGAATCAAATGAAAGTCAAACACATTAAACAAATCTTTTTA  
AATAAGATGAAAGTCAAACACATTCAAATATAGCATTTTGAATCAAATGAAAGTCAAACACATTAAACAAAGCTT  
TTTGAATCAAATAAAAGTCAAACACTATCAAATTAATCTTTTTGAACAAAATAAAGTCAAACACATTCAAACAATTA  
TTTTTAAATCGAAAAAAGTAAACACAATAAAACAAAGTTTTCTGAATCAAAAGAAAGTCAAACACATTAAACA  
AAGTTTTTTGATTCAAATGAAAGTCAAACACGTTCAAAAAATCTTTTTAAATCAAATGAAAGTCAAACACCTTTAA  
ACATAGCTTTTTGAATCAAATGAAAGTCAAACACATTCAAACAAAGTATTTTGAATCAAATGAAAGTCAAATACATT  
CAAACAAAGCTTTTTGAATCTAATGAAAGTCAAACACATTCAAACAATCTTTTTGAATCGAAATAAAGTAAACAA  
ATTCAAACAAAGCTTTTTGAATCAAAAGAAAGTCAAACACATTCAAACAAGCTTTTTGAATCAAATGAAAGTCAAA  
CACATTCAAACAAATCTTCAAATCAAATGAAAGTCAAACACATTCAAACATAGCTTTTTGAATCAAATGAAAGTC  
AAACACATTCAAACAAAGCTTTTTGAATCAAATGAAAGTCAAACACGTTCAAACAAAGCTTTTTGAATCAAATGAA  
AGTCAAATACATTCAAACAATCTTTTTGAATCGAAAAAAGTAAACACATTAAACAAAAATTTTTGAATCAAAA  
GAAAGTCAAACACATTCAAACAAAGTTTTTTTTGAATAAAATGAAAGTCAAACACATTCAAACAAAGCCTTTTAAATC  
AAATGAAAGTCAAACACATTCAAACAAAGCTTTTTGAATCAAATGAAAGTCAAACACATTCAAACAATCTTTTTGA  
ATCGAAATAAAGTAAACAAATCAAACAAGTTTTTTGAATCAAAAGAAAGTCAAACACATTCAAACAAATCTTTTT

TGAATCAAAAGAAATTTAAACACATTCAAACAAAGCTTTTTGAATCAAAATAAAGTCAAACACATTCAAACATAGC  
 TTTTGAATCAAATGAAAGTCAAACACATTGTAACAAAGCTTTTTGAATCAAATGAAAGTCAAACACATTCAAACAA  
 ATCTTTTATGATCGAAATACAGTCAAACACATTCAAACAAAGCTTTATCAATCAAAATAAAGTCAAACACATTCTAA  
 CAATTCTGTTTGAATCGAAATAAAGTAAACACATTCAAACAAGTTTTTTGAATCAAAAGAAAGTCAAACACATTCA  
 AACAAATCTTTTTAAATCATATGAAAGTCAAACACATTCAAACCTTAGTTTTTTAATCAAATGAAAGTCAAACACATT  
 TAAACAAAGCTTTTTGAATCAAATGAAAGTCAAACACTGAGAAGGGGGGCACTAGGTCATTGGACTAATCCTCCAT  
 AAGCCAAACAAAATTCGTAAACACTCAACTAACCTAAATACAAGTATAGAGGTAAGTCAAGGGTCGAGCCCAAAG  
 GAAC

Table of detected monomers

| Indices  | Period<br>Size | Copy<br>Number | Consensus<br>Size | Percent<br>Matches | Percent<br>Indels | Score | A  | C  | G | T  | Entropy<br>(0-2) |
|----------|----------------|----------------|-------------------|--------------------|-------------------|-------|----|----|---|----|------------------|
| 21--3181 | 40             | 79.2           | 40                | 87                 | 3                 | 4369  | 48 | 16 | 8 | 26 | 1.75             |

Consensus pattern (40 bp):

AAACACATTCAAACAAAGCTTTTTGAATCAAATGAAAGTC

Chenopodium quinoa clone 12-13p repeat region sequence Sequence ID: [HM641822.1](#)

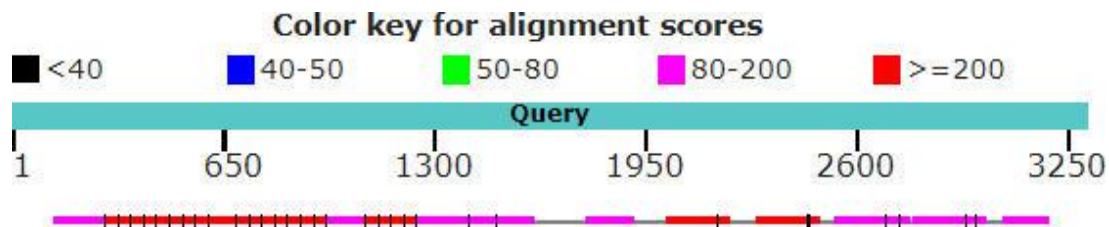



**Species with HOR formation on the base of CficCl-61-40 satDNA family tandem repeat arrays*****C. acuminatum***

## CLUSTER 1

&gt;CL1Contig164 (22324-234.7-5239947)

TTTCCCAATTGTTGTATATCGAATTAAATCTATTAGTTATTGCATATGTCCTGTCACATATCTTGCTTTAATCAGTTA  
 TATATGGCTTAAGTATGCGGTATTAGCTTTGTTGAATGCAGTTGACATTCATTTGATTCAAAAAGCTTTGTTGAAT  
 GTGTTTCACTTCATTTGATTCTAAAAGCTTTGTTGAATGTGTTTGACTTCATTTGACTCAATTAGCTTTGTTGAATG  
 CATTTGACATTCATTTGATTCAAAAAGCTTTGTTGAATGTGTTTACTTTCAATTGATTCTAAAAGCTTTGTTGAAAGT  
 GTTTGACTTCATTTGACTCAATTAGCTTTGTTGAATGCATTTGACTTCATTTGATTCAAAAAGCTTTGTTGAATG  
 TGTTTGACTTCATTTGATTCTAAAAGCTTTGTTGAAAGTGTTTGACTTCATTTGACTCAATTAGCTTTGTTGAATG  
 CATTTGACTTCATTTGAGTCACGAAGCTTTGTTGAATGTGTTTCACTTCATTTGATTCTAAAAGCTTTGTTGAAA  
 GTGTTTGGCTTCATTTGACTCAATTAGCATTGTGGAATGCAATTAACCTTCATTTGATTCAAAAAGCTTTGTTGAA  
 TGTGTTTACTTCATTTGATTCTAAAAGCTTTGTTGAAAGTGTTTGACTTCATTTGACTCAATTAGCTTTGTTGAAT  
 GCATTTGACTTCATTTGATTCAAAAAGCTTTGTTGAATGTGTTTCACTTCATTTGATTCTAAAAGCTTTGTTGAA  
 AGTGTTTGACTTCATTTGACTCAATTAGCTTTGTTGAATGCATTTGACTTCATTTGAGTCACGAAGCTTTGTTGA  
 ATGTGTTTCACTTCATTTGATTCTAAAAGCTTTGTTGAAAGTGTTTGGCTTCATTTGACTCAATTAGCATTGTGGA  
 ATGCAATTAACCTTCATTTGATTCAAAAAGCTTTGTTGAATGTATTTGACTTTAATTTGATTCTAAAAGCTTTGATG  
 AAAGTGTTTGACTTCATTTGACTCAATTAGCTTTGTTGAATGCATTTGACATTCATTTGAATCAAAAATCTTTGTTT  
 AAATGTGTTTGACGTTTCATTTGATTCTAAAAGCTTAGATGAAAGTGTTTGACTTCATTTGACTCAATTAGCTTTGT  
 GAATGCATTTGACATTCATTTGAATCAAAAAGCTTTGTTTAAATGTGTTTGACGTTTCATTTGATTCTAAAAGCTTTGA  
 TGAAAGTGTTTGACTTCATTTGACTCAATTAGCTTTGTTGAAAGTGTTTGGCTTCATTTGACTCAATTAGCATTGT  
 GGAATGCAATTAACCTTCATTTGATTCAAAAAGCTTTGTTGAATGTATTTGACTTCATTTGATTCTAAAAGCTTTG  
 TTGAAAGTGTTTGACTTCATTTGACTCAATTAGCTTTGTTGAATGCATTTGACATTCATTTGAATCAAAAAGCTTTG  
 TTAAATGTGTTTGACGTTTCATTTGATTCTAAAAGCTTAGATGAAAGTGTTTGACTTCATTTGACTCAATTAGCTTT  
 GTTGAATTCATTTGATTTTCATTTGATTCAAAAAGCTTTGTTGAATGTGTTTGACTTCATTTGATTCTAAAAGCTTT  
 GTTTGAATGTGTTTGACTTCATTTGATTATAAAAAGCTTTGTTGAAAGTGTTTGACTTCATTTGACTCAATTAGCTT  
 TGTTGAATGCATTTGACATTCATTTGAATCAAAAAGCTTTGTTGAATGTGTTTGACTTCATTTGATTCTAAAAGCT  
 TTGTTGAAAGTGTTTGACTTCATTTGACTCAATTAGCTTTGTTGAATGCATTTGACATTCATTTGAATCAAAAAGCT  
 TTGTTTAAATGTGTTTGACGTTTCATTTGATTCTAAAAGCTTTGTTGAAAGTGTTTGACTTCATTTGACTCAATTAGC  
 TTTGTTGAATGCATTTGACATTCATTTGAATCAAAAAGCTTTGTTTAAATGTGTTTGACGTTTCATTTGATTCTAAAAG  
 CTTAGATGAAAGTGTTTGACTTCATTTGACTCAATTAGCTTTGTTGAATTCATTTGATTTTCATTTGATTCAAAAAG

CTTTGTTGAATGTGTTGACTTTCATTTGATTCTAAAAGCTTTGTTGAAAGTGTTGGCTTTCATTTGACTCAATTA  
GCTTTGTTGAATGCATTTGACATTCATTTGAATCAAAAAGCTTTGTTTAAATGTGTTTGACGTTTCATTTGATTCTAAA  
AGCTTTGATGAAAGTGTTGACTTTCATTTGACTCAATTAGCTTTGTTGAATGCATTTGACATTCATTTGAATCAAAA  
AGCTTTGTTTAAATGTGTTTGACGTTTCATTTGATTCTAAAAGCTTAGATGAAAGTGTTGACTTTCATTTGACTCAAT  
TAGCTTTGTTGAATTCATTTGATTTTCATTTGATTCAAAAAGCTTTGTTTGAATGTGTTTGACTTTCATTTGATTCTAA  
AAGCTTTGTTGAAAGTGTTGGCTTTCATTTGACTCAATTAGCTTTGTTGAATGCATTTGACATTCATTTGAATCAAAA  
AAGCTTTGTTTAAATGTGTTTGACGTTTCATTTGATTCTAAAAGCTTAGATGAAAGTGTTGACTTTCATTTGACTCAA  
TTAGCTTTGTTGAATGCATTTGACATTCATTTGAATCAAAAAGCTTTGTTTAAATGTGTTTGACGTTTCATTTGATTCT  
AAAAGCTTAGATGAAAGTGTTGACTTTCATTTGACTCAATTAGCTTTGTTGAATTCATTTGATTTTCATTTGATTCA  
AAAAGCTTTGTTTGAATGTGTTTGACTTTCATTTGATTCTAAAAGCTTTGTTGAAAGTGTTTGACTTTCATTTGACTC  
AATTAGCTTTGTTGAATGCATTTGACATTCATTTGAATCAAAAAGCTTTGTTTAAATGTGTTTGACGTTTCATTTGATT  
CTAAAAGCTTAGATGAAAGTGTTGACTTTCATTTGACTCAATTAGCTTTGTTGAATTCATTTGATTTTCATTTGATT  
CAAAAAGCTTTGTTTGAATGTGTTTGACTTTCATTTGATTCTAAAAGCTTTGTTGAAAGTGTTGGCTTTCATTTGAC  
TCAATTAGCATTGTGGAATGCAATTAACCTTCATTTGATTCAAAAAGCTTTGTTTGAATGTGTTTGACTTTCATTTGA  
TTCTAAAAGCTTTGTAGAAAGTGTTGGCTTTCATTTGACTCAATTAGCATTGTGGAATGCAATTAACCTTCATTTGA  
TTCAAAAAGCTTTGATTGAATGTATTTGACTTTCATTTGATTCTAAACGCTTTGTTGCAATGTGTTTGACTTTCATTTA  
ATCAAAAAGCTTTGTTTAAATGTGTTTGACGTTTCATTTGATTCTAAAAGCTTAGATGAAAGTGTTTGACTTTCATTTG  
ACTCAATTAGCTTTGTTGAATTCATTTGATTTTCATTTGATTCAAAAAGCTTTGTTTGAATGTGTTTGACTTTCATTTG  
ATTCTAAAAGCTTTGTTGAAAGTGTTGGCTTTCATTTGACTCAATTAGCATTGTGGAATGCAATTAACCTTCATTTG  
ATTCAAAAAGCTTTGATTGAATGTATTTGACTTTCATTTGATTCTAAAAGCTTTGTTGAAAGTGTTGGCTTTCATTT  
GACTCAATTAGCATTGTGGAATGCAATTAACCTTCATTTGATTCAAAAAGCTTTGATTGAATGTATTTGACTTTCATT  
TGATTCTAAACGCTTTGTTGCAAGTGTTTGACTTTCATTTGACTCAATTAGCTTTGTTGAATTCATTTGATTTTCATTT  
GATTCAAAAAGCTTTGTTTGAATGTGTTTGACTTTCATTTGATTCTAAAAGCTTTGTTGAAAGTGTTGGCTTTCATT  
TGACTCAATTAGCATTGTGGAATGCAATTAACCTTCATTTGATTCAAAAAGCTTTGATTGAATGTATTTGACTTTCATT  
TTGATTCTAAACGCTTTGTTGCAAGTGTTTGACTTTCATTTGACTCAATTAGCTTTGTTGAATGCATTTGATTTTCATT  
TGATTCAAAAAGCTTTGTTTGAATGTGTTTGACTTTCATTTGATTCTAAAAGCTTTGTTGAAAGTGTTGGCTTTCATT  
TTGACTCAATTAGCATTGTGGAATGCAATTAACCTTCATTTGATTCAAAAAGCTTTGATTGAATGTATTTGACTTTCATT  
TTTGATTCTAAACGCTTTGTTGCAAGTGTTTGACTTTCATTTGACTCAATTAGCTTTGTTGAATGCATTTGATTTTCATT  
TTGATTCAAAAAGCTTTGTTTGAATGTGTTTGACTTTCATTTGATTCTAAAAGCTTTGTTGAAAGTGTTGGCTTTCATT  
TTTGACTCAATTAGCATTGTGGAATGCAATTAACCTTCATTTGATTCAAAAAGCTTTGATTGAATGTATTTGACTTTCATT  
ATTTGATTCTAAACGCTTTGTTGCAAGTGTTTGACTTTCATTTGACTCAATTAGCTTTGTTGAATGCATTTGATTTTCATT  
TTTGATTCAAAAAGCTTTGTTTGAATGTGTTTGACTTTCATTTGATTCTAAAAGCTTTGTTGAAAGTGTTGGCTTTCATT

ATTTGACTCAATTAGCATTGTGGAATGCAATTAACCTTCATTTGATTCAAAAAGCTTTGATTGAATGTATTTGACTTT  
CATTTGATTCTAAACGCTTTGTTGCAAGTGTTTGACTTTCATTTGACTCAATTAGCTTTGTTGAATGCATTTGATTTTC  
ATTTGATTCAAAAAGCTTTGTTTGAATGTGTTTGACTTTCATTTGATTCTAAAAGCTTTGTTGAAAGTGTTTGGCTTC  
ATTTGACTCAATTAGCATTGTGGAATGCAATTAACCTTCATTTGATTCAAAAAGCTTTGATTGAATGTATTTGACTTT  
CATTTGATTCTAAACGCTTTGTTGCAAGTGTTTGACTTTCATTTGACTCAATTAGCATTGTGGAATGCAATTAACCTT  
CATTTGATTCAAAAAGCTTTGTTTGAATGTGTTTGACTTTCATTTGATTCTAAAAGCTTTGTTGAAAGTGTTTGGCTT  
TCATTTGACTCAATTAGCATTGTGGAATGCAATTAACCTTCATTTGATTCAAAAAGCTTTGATTGAATGTATTTGACT  
TTCATTTGATTCTAAACGCTTTGTTGCAAGTGTTTGACTTTCATTTGACTCAATTAGCTTTGTTGAATGCATTTGATTT  
TCATTTGATTCAAAAAGCTTTGTTTGAATGTGTTTCACTTTCATTTGATTCTAAAAGCTTTGTTGAAAGTGTTTGGCT  
TTCATTTGACTCAATTAGCATTGTGGAATGCAATTAACCTTCATTTGATTCAAAAAGCTTTGATTGAATGTATTTGAC  
TTTCATTTGATTCTAAACGCTTTGTTGCAAGTGTTTGACTTTCATTTGACTCAATTAGCTTTGTTGAATGCATTTGATT  
TTCATTTGATTCAAAAAGCTTTGTTTGAATGTGTTTCACTTTCATTTGATTCTAAAAGCTTTGTTGAAAGTGTTTGAC  
TTTCATTTGACTCAATTAGCTTTGTTGAATGCATTTGATTTTCATTTGATTCAAAAAGCTTTGTTTGAATGTGTTTCAC  
TTTCATTTGATTCTAAAAGCTTTGTTGAAAGTGTTTGACTTTCATTTGACTCAATTATTTGAATGTGTTTGACTTTCAT  
TTGATTCTAAAAGCTTTGTTGAAAGTGTTTGGCTTTCATTTGACTCAATTAGCATTGTGGAATGCAATTAACCTTCAT  
TTGATTCAAAAAGCTTTGATTGAATGTATTTGACTTTCATTTGATTCTAAACGCTTTGTTGCAAGTGTTTGACTTTCA  
TTTGACTCAATTAGCTTTGTTGAATGCATTTGATTTTCATTTGATTCAAAAAGCTTTGTTTGAATGTGTTTCACTTTCA  
TTTGATTCTAAAAGCTTTGTTGAAAGTGTTTGACTTTCATTTGACTTAATTAGCTTTGTTGAATGCATTTGACTTTCAT  
TTGATTCTAAAAGCTTTGTTGAAAGTGTTTGGCTTTCATTTGACTCAATTAGCATTGTGGAATGCAATTAACCTTCAT  
TTGATTCAAAAAGCTTTGATTGAATGTATTTGACTTTCATTTGATTCTAAAAGCTTTGTTGAAAGTGTTTGACTTTCA  
TTTGACTCAATTAGCTTTGTTGAATGCATTTGATTTTCATTTGATTCAAAAAGCTTTGTTTGAATGTGTTTCACTTTCA  
TTTGATTCTAAAAGCTTTGTTGAAAGTGTTTGACTTTCATTTGACTCAATTAGCATTGTGGAATGCAATTAACCTTCAT  
TTTGATTCAAAAAGCTTTGATTGAATGTATTTGACTTTCATTTGATTCTAAAAGCTTTGTTGAAAGTGTTTGACTTTTC  
ATTTGACTCAATTAGCTTTGTTGAATGCATTTGATTTTCATTTGATTCAAAAAGCTTTGTTTGAATGTGTTTCACTTTC  
ATTTGATTCTAAAAGCTTTGTTGAAAGTGTTTGACTTTCATTTGACTCAATTAGCTTTGTTGAATGCAATTAACCTTTC  
ATTTGATTCAAAAAGCTTTGATTGAATGTATTTGACTTTAATTTGATTCTAAAAGCTTTGATGAAAGTGTTTGACTTT  
CATTTGACTCAATTAGCTTTGTTGAATTCATTTGATTTTCATTTGATTCAAAAAGCTTTGTTTGAATGTGTTTCACTTT  
CATTTGATTCTAAAAGCTTTGTTGAAAGTGTTTGACTTTCATTTGACTTAATTAGCTTTGTTGAATGCAGTTGACATT  
CATTTGATTCAAAAAGCTTTGTTTGAATGTGTTTCACTTTCATTTGATTCTAAAAGCTTTGTTGAAAGTGTTTGACTTT  
TCATTTGACTCAATTAGCTTTGTTGAATGCAATTGACTTTCATTTGATTCAAAAAGCTTTGATTGAATGTATTTGACT  
TTCATTTGATTCTAAAAGCTTTGTTGAAAGTGTTTGACTTTCATTTGACTCAATTAGCTTTGTTGAATGCATTTGATTT  
TCATTTGATTCAAAAAGCTTTGTTTGAATGTGTTTCACTTTCATTTGATTCTAAAAGCTTTGTTGAAAGTGTTTGACT

TTCATTTGACTCAATTAGCTTTGTTGAATGCAATTGACTTTCATTTGATTCAAAAAGCTTTGTTTGAATGTATTTGAC  
TTTCATTTGATTCTAAAAGCTTTGTTGAAAGTGTTTGACTTTCATTTGACTCAATTAGCTTTGTTGAATGCATTTGATT  
TTCATTTGATTCAAAAAGCTTTGTTTGAATGTGTTTCACTTTCATTTGATTCTAAAAGCTTTGTTGAAAGTGTTTGAC  
TTTCATTTGACTCAATTAGCTTTGTTGAATGCATTTGACTTTCATTTGATTCAAAAAGCTTTGTTTGAATGTGTTTAC  
TTTCATTTGATTCTAAAAGCTTTGTTGAAAGTGTTTGACTTTCATTTGACTTAATTAGCTTTGTTGAATGCAGTTGAC  
ATTCATTTGATTCAAAAAGCTTTGTTTGAATGTGTTTGACTTTCATTTGATTCTAAAAGCTTTGTTTGACTCAATTAG  
CATTGTGGAATGCAATTAACCTTTCATTTGATTCAAAAAGCTTTGATTGAATGTATTTGACTTTCATTTGATTCTAAAA  
GCTTTGTTGAAAGTGTTTGACTTTCATTTGACTCAATTAGCTTTGTTGAATGCAATTGACTTTCATTTGATTCAAAAA  
GCTTTGATTGAATGTATTTGACTTTCATTTGATTCTAAAAGCTTTGTTGAAAGTGTTTGACTTTCATTTGACTCAATT  
AGCTTTGTTGAATGCATTTGATTTTCATTTGATTCAAAAAGCTTTGTTTGAATGTGTTTCACTTTCATTTGATTCTAAA  
AGCTTTGTTGAAAGTGTTTGACTTTCATTTGACTTAATTAGCTTTGTTGAATGCAGTTGACATTCATTTGATTCAAAA  
AGCTTTGTTTGAATGTGTTTGACTTTAATTTGATTCTAAAAGCTTTGATGAAAGTGTTTGACTTTCATTTGACTCAAT  
TAGCTTTGTTGAATTCATTTGATTTTCATTTGATTCAAAAAGCTTTGTTTGAATGTGTTTGACTTTCATTTGATTCTAA  
AAGCTTTGTTGAAAGTGTTTGACTTTCATTTGACTCAATTAGCTTTGTTGAATGCATTTGACTTTCATTTGATTCAAA  
AAGCTTTGTTTGAATGTGTTTGACTTTCATTTGATTCTAAAAGCTTTGTTGAAAGTGTTTGACTTTCATTTGACTCAA  
TTAGCTTTGTTGAATGCATTTGATTTTCATTTGATTCAAAAAGCTTTGTTTGAATGTGTTTCACTTTCATTTGATTCTA  
AAAGCTTTGTTGAAAGTGTTTGACTTTCATTTGACTTAATTAGCTTTGTTGAATGCAGTTGACATTCATTTGATTCAA  
AAAGCTTTGTTTGAATGTGTTTGACTTTCATTTGATTCTAAAAGCTTTGTTGAAAGTGTTTGACTTTCATTTGACTCA  
ATTAGCTTTGTTGAATGCATTTGACTTTCATTTGATTCAAAAAGCTTTGTTTGAATGTGTTTGACTTTCATTTGATTCT  
AAAAGCTTTGTTGAAAGTGTTTGACTTTCATTTGACTCAATTAGCTTTGTTGAATGCATTTGATTTTCATTTGATTCA  
AAAAGCTTTGTTTGAATGTGTTTCACTTTCATTTGATTCTAAAAGCTTTGTTGAAAGTGTTTGACTTTCATTTGACTT  
AATTAGCTTTGTTGAATGCAGTTGACATTCATTTGATTCAAAAAGCTTTGTTTGAATGTGTTTCACTTTCATTTGATT  
CTAAAAGCTTTGTTGAAAGTGTTTGACTTTCATTTGACTCAATTAGCTTTGTTGAATGCATTTGACTTTCATTTGATT  
CAAAAAGCTTTGTTTGAATGTGTTTGACTTTCATTTGATTCTAAAAGCTTTGATGAAAGTGTTTGACTTTCATTTGAC  
TCAATTAGCTTTGTTGAATGCATTTGACTTTCATTTGATTCAAAAAGCTTTGTTTGAATGTGTTTGACTTTCATTTGAT  
TCTAAAAGCTTTGATGAAAGTGTTTGACTTTCATTTGACTCAATTAGCTTTGTTGAATGCATTTGATTTTCATTTGAT  
TCAAAAAGCTTTGTTTGAATGTGTTTCACTTTCATTTGATTCTAAAAGCTTTGTTGAAAGTGTTTGACTTTCATTTGA  
CTTAATTAGCTTTGTTGAATGCAGTTGACATTCATTTGATTCAAAAAGCTTTGTTTGAATGTGTTTCACTTTCATTTG  
ATTCTAAAAGCTTTGTTGAAAGTGTTTGACTTTCATTTGACTTAATTAGCTTTGTTGAATGCATTTGACATTCATTTG  
ATTCAAAAAGCTTTGTTTGAATGTGTTTGACTTTCATTTGATTCTAAAAGCTTTGTTGAAAGTGTTTGACTTTCATTT  
GACTCAATTAGCTTTGTTGAATGCAATTAACCTTTCATTTGATTCAAAAAGCTTTGTTTGAATGTATTTGACTTTCATTT  
GATTCTAAAAGCTTTGTTGAAAGTGTTTGACTTTCATTTGACTCAATTAGCTTTGTTGAATGCATTTGATTTTCATTT

GATTCAAAAAGCTTTGTTGAATGTGTTTCACTTTCATTTGATTCTAAAAGCTTTGTTGAAAGTGTTTGACTTTCATT  
TGACTCAATTAGCTTTGTTGAATGCAATTGACTTTCATTTGATTCAAAAAGCTTTGATTGAATGTATTTGACTTTCAT  
TTGATTCTAAACGCTTTGTTGCAAGTGTTTGACTTTCATTTGACTCAATTAGCTTTGTTGAATGCATTTGATTTTCATT  
TGATTCAAAAAGCTTTGTTGAATGTGTTTCACTTTCATTTGATTCTAAAAGCTTTGTTGAAAGTGTTTGACTTTCAT  
TTGACTTAATTAGCTTTGTTGAATGCATTTGACTTTCATTTGATTCAAAAAGCTTTGTTGAATGTGTTTCACTTTCAT  
TTGATTCTAAAAGCTTTGTTGAAAGTGTTTGACTTTCATTTGACTTAATTAGCTTTGTTGAATGCAGTTGACATTCAT  
TTGATTCAAAAAGCTTTGTTGAATGTGTTTCACTTTCATTTGATTCTAAAAGCTTTGTTGAAAGTGTTTGACTTTCA  
TTTGACTTAATTAGCTTTGTTGAATGCAGTTGACATTCATTTGATTCAAAAAGCTTTGTTGAATGTGTTTCACTTTC  
ATTTGATTCTAAAAGCTTTGATTGAATGTATTTGACTTTAATTTGATTCTAAAAGCTTTGATGAAAATGGTAGACCTT  
CATTTGACTCAATTAGCTTTGTTGAATTCATTTAACTTTCATTTGATTCAAAAAGCTTTGTTGAATGTATTTGACTTT  
CATTTGATTCTAAACGCTTTGTTGAAAGTGTTTGACTTTCATTTGACTCAATTAGCTTTGTTGAATGCATTTGATTTTC  
ATTTGATTCAAAAAGCTTTGTTGAATGTGTTTGACTTTCATTTGATTCTAAAAGCTTTGTTGAAAGTGTTTGACTTT  
CATTTGACTCAATTAGCTTTGTTGAATGCATTTGATTTTCATTTGATTCAAAAAGCTTTGTTGAATGTGTTTCACTTT  
CATTTGATTCTAAAAGCTTTGTTGAAAGTGTTTGACTTTCATTTGACTCAATTAGCTTTGTTGAATGCATTTGATTTT  
CATTTGATTCAAAAAGCTTTGTTGAATGTGTTTCACTTTCATTTGATTCTAAAAGCTTTGTTGAAAGTGTTTGACTT  
TCATTTGACTTAATTAGCTTTGTTGAATGCAGTTGACATTCATTTGATTCAAAAAGCTTTGTTGAATGTGTTTGACT  
TTCATTTGATTCTAAAAGCTTTGTTGAAAGTGTTTGACTTTCATTTGACTCAATTAGCTTTGTTGAATTCATTTGATTT  
TCATTTGATTCAAAAAGCTTTGTTGAATGTGTTTCACTTTCATTTGATTCTAAAAGCTTTGTTGAAAGTGTTTGACT  
TTCATTTGACTTAATTAGCTTTGTTGAATGCATTTGACATTCATTTGATTCAAAAAGCTTTGTTGAATGTGTTTCACT  
TTCATTTGATTCTAAAAGCTTTGTTGAAAGTGTTTGACTTTCATTTGACTTAATTAGCTTTGTTGAATGCAGTTGACA  
TTCATTTGATTCAAAAAGCTTTGTTGAATGTGTTTCACTTTCATTTGATTCTAAAAGCTTTGTTGAAAGTGTTTGAC  
TTTCATTTGACTCAATTAGCTTTGTTGAATGCATTTGATTTTCATTTGATTCAAAAAGCTTTGTTGAATGTGTTTCACT  
TTTCATTTGATTCTAAAAGCTTTGTTGAAAGTGTTTGACTTTCATTTGACTTAATTAGCTTTGTTGAATGCAGTTGAC  
ATTCATTTGATTCAAAAAGCTTTGTTGAATGTGTTTCACTTTCATTTGATTCTAAAAGCTTTGTTGAAAGTGTTTGA  
CTTTCATTTGACTTAATTAGCTTTGTTGAATGCAGTTGACATTCATTTGATTCAAAAAGCTTTGTTGAATGTGTTTC  
ACTTTCATTTGATTCTAAAAGCTTTGTTGAAAGTGTTTGACTTTCATTTGACTCAATTAGCTTTGTTGAATGCATTTG  
ATTTTCATTTGATTCAAAAAGCTTTGTTGAATGTGTTTCACTTTCATTTGATTCTAAAAGCTTTGTTGAAAGTGTTT  
GACTTTCATTTGACTCAATTAGCTTTGTTGAATGCATTTGACATTCATTTGAATCAAAAAGCTTTGTTTAAATGTGTT  
TGACCTTCATTTGATTCTAAAAGCTTAGATGAAAGTGGAATGAATGTATTTGACTTTCATTTGATTCTAAACGCTTTG  
TTGCAAGTGTTTGACTTTCATTTGACTCAATTAGCTTTGTTGAATGCATTTGATTTTCATTTGATTCAAAAAGCTTTG  
TTTGAATGTGTTTGACTTTCATTTGATTCTAAAAGCTTTGTTGAAAGTGTTTGACTTTCATTTGACTCAATTAGCTTT  
GTTGAATGCATTTGATTTTCATTTGATTCAAAAAGCTTTGTTGAATGTGTTTCACTTTCATTTGATTCTAAAAGCTTT

GTTGAAAGTGTTTGACTTTCATTTGACTTAATTAGCTTTGTTGAATGCAGTTGACATTCATTTGATTCAAAAAGCTTT  
GTTTGAATGTGTTTCACTTTCATTTGATTCTAAAAGCTTTGTTGAAAGTGTTTGACTTTCATTTGACTCAATTAGCTTT  
GTTGAATGCATTTGATTTTCATTTGATTCAAAAAGCTTTGTTTGAATGTGTTTCACTTTCATTTGATTCTAAAAGCTTT  
GTTGAAAGTGTTTGACTTTCATTTGACTCAATTAGCTTTGTTGAATGCATTTGACATTCATTTGATTCAAAAAGCTTT  
GTTTGAATGTGTTTCACTTTCATTTGATTCTAAAAGCTTTGTTGAAAGTGTTTGACTTTCATTTGACTTAATTAGCTTT  
GTTGAATGCAGTTGACATTCATTTGATTCAAAAAGCTTTGTTTGAATGTGTTTCACTTTCATTTGATTCTAAAAGCTT  
TGTTGAATGTGTTTGACTTTCATTTGACTCAATTAGCTTTGTTGAATTCATTTGATTTTCATTTGATTCAAAAAGCTTT  
GTTTGAATGTGTTTGACTTTCATTTGATTCTAAAAGCTTTGTTGAAAGTGTTTGACTTTCATTTGACTCAATTAGCTT  
TGTTGAATGCATTTGATTTTCATTTGATTCAAAAAGCTTTGTTTGAATGTGTTTCACTTTCATTTGATTCTAAAAGCTT  
TGTTGAAAGTGTTTGACTTTCATTTGACTTAATTAGCTTTGTTGAATGCAGTTGACATTCATTTGATTCAAAAAGCTT  
TGTTTGAATGTGTTTCACTTTCATTTGATTCTAAAAGCTTTGTTGAAAGTGTTTGGCTTTCATTTGACTCAATTAGCTT  
TGTTGAATGCATTTAACTTAGGTTTGTTGAATGTATTTAATTTCATTTGAGTCACAAAAGCTTTGTTTGAATGTGTT  
TGACTTTCATTTGACTCAATTAGCTTTGTTGAATTCATTTGATTTTCATTTGATTCAAAAAGCTTTGTTTGAATGTGTT  
TGACTTTCATTTGATTCTAAAAGCTTTGATGAAAGTGTTTGACTTTCATTTGACTCAATTAGCTTTGTTGAATTCATT  
GATTTTCATTTGATTCAAAAAGCTTTGTTTGAATGTGTTTCACTTTCATTTGATTCTAAAAGCTTTGTTGAAAGTGTT  
TGACTTTCATTTGACTTAATTAGCTTTGTTGAATGCAGTTGACATTCATTTGATTCAAAAAGCTTTGTTTGAATGTGT  
TTCATTTTCATTTGATTCTAAAAGCTTTGTTGAAAGTGTTTGACTTTCATTTGACTCAATTAGCATTGTGGAATGCAA  
TTGACTTTCATTTGATTCTAAAAGCTTTGATGAAAGTGTTTGACTTTCATTTGACTCAATTAGCTTTGTTGAATTCATT  
TGATTTTCATTTGATTCAAAAAGCTTTGTTTGAATGTGTTTCACTTTCATTTGATTCTAAAAGCTTTGTTGAAAGTGTT  
TTGACTTTCATTTGACTTAATTAGCTTTGTTGAATGCAGTTGACATTCATTTGATTCAAAAAGCTTTGTTTGAATGTG  
TTTCACTTTCATTTGATTCTAAAAGCTTTGTTGAAAGTGTTTGACTTTCATTTGACTCAATTAGCTTTGTTGAATGCAT  
TTGACATTCATTTGATTCAAAAAGCTTTGTTTGAATGTGTTTCACTTTCATTTGATTCTAAAAGCTTTGTTGAAAGTG  
TTTGACTTTCATTTGACTCAATTAGCTTTGTTGAATTCATTTGATTTTCATTTGATTCAAAAAGCTTTGTTTGAATGTG  
TTTCACTTTCATTTGATTCTAAAAGCTTTGTTGAAAGTGTTTGACTTTCATTTGACTCAATTAGCTTTGTTGAATGCAT  
TTGACTTTCATTTGATTCAAAAAGCTTTGTTTGAATGTGTTTCACTTTCATTTGATTCTAAAAGCTTTGTTGAAAGTG  
TTTGACTTTCATTTGACTCAATTAGCTTTGTTGAATGCATTTGATTTTCATTTGATTCAAAAAGCTTTGTTTGAATGTG  
TTTCACTTTCATTTGATTCTAAAAGCTTTGTTGAAAGTGTTTGACTTTCATTTGACTCAATTAGCTTTGTTGAATGCAT  
TTTGACTTTCATTTGACTCAATTAGCTTTGTTGAATGCATTTGATTTTCATTTGATTCAAAAAGCTTTGTTTGAATGTG  
TTTCACTTTCATTTGATTCTAAAAGCTTTGTTGAAAGTGTTTGACTTTCATTTGACTTAATTAGCTTTGTTGAATGCA  
GTTGACATTCATTTGATTCAAAAAGCTTTGTTTGAATGTGTTTCACTTTCATTTGATTCTAAAAGCTTTGTTGAAAGT  
GTTTGACTTTCATTTGACTCAATTAGCTTTGTTGAATGCATTTGACATTCATTTGATTCAAAAAGCTTTGTTTGAATG  
TGTTTCACTTTCATTTGATTCTAAAAGCTTTGTTGAAAGTGTTTGACTTTCATTTGACTCAATTAGCTTTGTTGAATTC  
ATTTGATTTTCATTTGATTCAAAAAGCTTTGTTTGAATGTGTTTCACTTTCATTTGATTCTAAAAGCTTTGTTGAAAGT  
GTTTGACTTTCATTTGACTCAATTAGCTTTGTTGAATGCATTTGATTTTCATTTGATTCAAAAAGCTTTGTTTGAATGT

GTTCACCTTCATTTGATTCTAAAAGCTTTGTTGAAAGTGTTGACTTCATTTGACTTAATTAGCTTTGTTGAATGC  
AGTTGACATTCATTTGATTCAAAAAGCTTTGTTGAATGTGTTGACTTCATTTGATTCTAAAAGCTTTGTTGAAAG  
TGTTGGCTTCATTTGACTCAATTAGCATTGTGGAATGCAATTAACCTTCATTTGATTCAAAAAGCTTTGTTGAAT  
GTGTTGACTTCATTTGATTCTAAAAGCTTTGTTGAAAGTGTTGACTTCATTTGACTCAATTAGCTTTGTTGAAT  
GCATTTGACTTCATTTGAATCAAAAAGCTTTGTTGAATGTGTTGACTTCTTTGACTCAATTAGCTTTGTTGAA  
TGTGTTGACTTCATTTGACTTTTTGTTGAAAGTGTTGACTTCATTTGACTCAATTAGCTTTGTTGAATTCATTTG  
ATTTTCATTTGATTCAAAAAGCTTTGTTGAATGTGTTGACTTCATTTGATTCTAAAAGCTTTGTTGAAAGTGTT  
GACTTCATTTGACTCAATTAGCTTTGTTGAATGCATTTGACATTCATTTGATTCAAAAAGCTTTGTTGAATGTGT  
TCACTTCATTTGATTCTAAAAGCTTTGTTGAAAGTGTTGACTTCATTTGACTCAATTAGCTTTGTTGAATGCATTT  
GACTTCATTTGATTCAAAAAGCTTTGTTGAATGTGTTGACTTCATTTGATTCTAAAAGCTTTGTTGAAAGTGTT  
TGACTTCATTTGACTTAATTAGCTTTGTTGAATGCAGTTGACATTCATTTGATTCAAAAAGCTTTGTTGAATGTGT  
TTCATTCATTTGATTCTAAAAGCTTTGTTGAAAGTGTTGACTTCATTTGACTCAATTAGCTTTGTTGAATGCATT  
TGACTTCATTTGATTCAAAAAGCTTTGTTGAATGTGTTGACTTCATTTGATTCTAAAAGCTTTGTTGAAAGTGTT  
TTGACTTCATTTGACTTAATTAGCTTTGTTGAATGCAGTTGACATTCATTTGATTCAAAAAGCTTTGTTGAATGTG  
TTTCACTTCATTTGATTCTAAAAGCTTTGTTGAAAGTGTTGGCTTCATTTGACTCAATTAGCATTGTGGAATGCA  
ATTAACCTTCATTTGATTCAAAAAGCTTCATTGACTTCATTTGATTAAAAAGCATTGTTGAAAGTGTTGACTTT  
CATTTGACTCAATTAGCTTTGTTGAATTCATTTGATTTTCATTTGATTCAAAAAGCTTTGTTGAATGTGTTTCACTTT  
CATTTGATTCTAAAAGCTTTGTTGAAAGTGTTGACTTCATTTGACTCAATTAGCTTTGTTGAATGCATTTGACATT  
CATTTGATTCAAAAAGCTTTGTTGAATGTGTTTCACTTCATTTGATTCTAAAAGCTTTGTTGAAAGTGTTGACTT  
TCATTTGACTTAATTAGCTTTGTTGAATGCAGTTGACATTCATTTGATTCAAAAAGCTTTGTTGAATGTGTTTCACT  
TTCATTTGATTCTAAAAGCTTTGTTGAATGTGTTGACTTCATTTGACTCAATTAGCTTTGTTGAATGCATTTGACA  
TTCATTTGATTCAAAAAGCTTTGTTGAATGTGTTTCACTTCATTTGATTCTAAAAGCTTTGTTGAAAGTGTTGAC  
TTTCATTTGACTCAATTAGCTTTGTTGAATGCAGTTGACATTCATTTGATTCAAAAAGCTTTGTTGAATGTGTTTCA  
CTTCATTTGATTCTAAAAGCTTTGTTGAAAGTGTTGGCTTCATTTGACTCAATTAGCATTGTGGAATGCAATTAA  
CTTCATTTGATTCAAAAAGCTTTGTTGAATTAGCTTTGTTGAATTCATTTGATTTTCATTTGATTCAAAAAGCTTTG  
TTTGAATGTGTTTCACTTCATTTGATTCTAAAAGCTTTGTTGAAAGTGTTGACTTCATTTGACTCAATTAGCTTTG  
TTGAATGCATTTGATTTTCATTTGATTCAAAAAGCTTTGTTGAATGTGTTTCACTTCATTTGATTCTAAAAGCTTTG  
TTGAAAGTGTTGACTTCATTTGACTTAATTAGCTTTGTTGAATGCAGTTGACATTCATTTGATTCAAAAAGCTTTG  
TTTGAATGTGTTTCACTTCATTTGATTCTAAAAGCTTTGTTGAAAGTGTTGACTTCATTTGACTCAATTAGCTTTG  
TTGAATGCATTTGACATTCATTTGATTCAAAAAGCTTTGTTGAATGTGTTTCACTTCATTTGATTCTAAAAGCTTT  
GTTGAAAGTGTTGGCTTCATTTGACTCAATTAGCTTTGTTGAATGCAATTGACTTCATTTGATTCAAAAAGCTTT  
GTTTGAATGTGTTTCACTTCATTTGATTCTAAAAGCTTTGTTGAAAGTGTTGACTTCATTTGACTTAATTAGCTTT

GTTGAATGCAGTTGACATTCATTTGATTCAAAAAGCTTTGTTGAATGTGTTTCACTTTCATTTGATTCTAAAAGCTT  
TGTTGAAAGTGTTTGACTTTCATTTGACTCAATTAGCATTGTGGAATGCAATTAACCTTTCATTTGATTCAAAAAGCTT  
TGTTTGAATGTATTTGACTTTCATTTGACTCAATTGGCTTTGTTGAATGCATTTGACTTTCATTTGACTCAATTAGTTT  
TCATTTGACTCAATTTGGCTTTCATTTCGACTCAATTAGCTTTGTTGAATTCATTTGATTTTCATTTGATTCAAAAAGCT  
TTGTTTGAATGTGTTTCACTTTCATTTGATTCTAAAAGCTTTGTTGAAAGTGTTTGACTTTCATTTGACTTAATTAGCT  
TTGTTGAATGCATTTGATTTTCATTTGATTCAAAAAGCTTTGTTTGAATGTGTTTCACTTTCATTTGATTCTAAAAGCT  
TTGTTGAAAGTGTTTGACTTTCATTTGACTTAATTAGCTTTGTTGAATGCAGTTGACATTCATTTGATTCAAAAAGCT  
TTGTTTGAATGTGTTTCACTTTCATTTGATTCTAAAAGCTTTGTTGAAAGTGTTTGACTTTCATTTGACTCAATTAGCT  
TTGTTGAATGCAATTGACTTTCATTTGATTCAAAAAGCTTTGTTTGAATGTGTTTCACTTTCATTTGATTCTAAAAGC  
TTTGTTGAAAGTGTTTGACTTTCATTTGACTTAATTAGCTTTGTTGAATGCAGTTGACATTCATTTGATTCAAAAAGC  
TTTGTTTGAATGTGTTTCACTTTCATTTGATTCTAAAAGCTTTGTTGAAAGTGTTTGGCTTTCATTTGACTCAATTAGC  
ATTGTGGAATGCAATTAACCTTTCATTTGATTCAAAAAGCTTTGTTTGAATGTATTTGACTTTCATTTGATTCTAAAAG  
CTTTGTTGAAAGTGTTTGACTTTCATTTGACTTAATTAGCTTTGTTGAATGCAGTTGACATTCATTTGATTCAAAAAG  
CTTTGTTTGAATGTGTTTCACTTTCATTTGATTCTAAAAGCTTTGTTGAAAGTGTTTGGCTTTCATTTGACTCAATTAG  
CATTGTGGAATGCAATTAACCTTTCATTTGATTCAAAAAGCTTTGTTTGAATGTATTTGACTTTAATTTGATTCTAAAA  
GCTTTGATGAAAGTGTTTGACTTTCATTTGACTCAATTAGCTTTGTTGAATTCATTTGATTTTCATTTGATTCTAAAA  
GCTTTGTTGAAAGTGTTTGACTTTCATTTGACTTAATTAGCTTTGTTGAATGCAGTTGACATTCATTTGATTCAAAAA  
GCTTTGTTTGAATGTGTTTCACTTTCATTTGATTCTAAAAGCTTTGTTGAAAGTGTTTGGCTTTCATTTGACTCAATTA  
GCATTGTGGAATGCAATTAACCTTTCATTTGATTCAAAAAGCTTTGTTTGAATGTATTTGACTTTAATTTGATTCTAAA  
AGCTTTGATGAAAGTGTTTGACTTTCATTTGACTCAATTAGCTTTGTTGAATTCATTTTCACTTTCATTTGATTCTAAA  
AGCTTTGTTGAAAGTGTTTGACTTTCATTTGACTTAATTAGCTTTGTTGAATGCAGTTGACATTCATTTGATTCAAAA  
AGCTTTGTTTGAATGTGTTTCACTTTCATTTGATTCTAAAAGCTTTGTTGAAAGTGTTTGGCTTTCATTTGACTCAATT  
AGCATTGTGGAATGCAATTAACCTTTCATTTGATTCAAAAAGCTTTGTTTGAATGTATTTGACTTTAATTTGATTCTAA  
AAGCTTTGTTGAAAGTGTTTGACTTTCATTTGACTTAATTAGCTTTGTTGAATGCAGTTGACATTCATTTGATTCAAA  
AAGCTTTGTTTGAATGTGTTTCACTTTCATTTGATTCTAAAAGCTTTGTTGAAAGTGTTTGGCTTTCATTTGACTCAA  
TTAGCATTGTGGAATGCAATTAACCTTTCATTTGATTCAAAAAGCTTTGTTTGAATGTATTTGACTTTAATTTGATTCT  
AAAAGCTTTGATGAAAGTGTTTGACTTTCATTTGACTCAATTAGCTTTGTTGAATTCATTTGATTTTCATTTGATTTTC  
ATTTGACTTAATTAGCTTTGTTGAATGCAGTTGACATTCATTTGATTCAAAAAGCTTTGTTTGAATGTGTTTCACTTT  
CATTTGATTCTAAAAGCTTTGTTGAAAGTGTTTGGCTTTCATTTGACTCAATTAGCATTGTGGAATGCAATTAACCTT  
CATTTGATTCAAAAAGCTTTGTTTGAATGTATTTGACTTTAATTTGATTGTAAAACCTTTGATGAAAGTGTTTGACTT  
TCATTTGACTCAATTAGCTTTGTTGAATTCATTTGATTTTCATTTGATTCTTGCAAGTGTTTGGCTTTCATTTGA  
CTTAATTAGCTTTGTTGAATGCAGTTGACATTCATTTGATTCAAAAAGCTTTGTTTGAATGTGTTTCACTTTCATTTG



ATTCTAAAAGCTTTGTTGAAAGTGTTGGCTTTCATTTGACTCAATTAGCATTGTGGAATGCAATTAACCTTCATTTG  
ATTCAAAAAGCTTTGTTTGAATGTATTTGACTTTAATTTGATTCTAAAAGCTTTGATGAAAGTGTTGACTTTCATTT  
GACTCAATTAGCTTTGTTGAATGCATTTGACTTTCATTTGATTCAAAAAGCTTTGTTTGAATGTATTTGACTTTAATT  
TGATTCTAAAAGCTTTGATGAAAGTGTTGACTTTCATTTGACTCAATTAGCTTTGTTGAATTCATTTGATTTTCATTT  
GATTCAAAAAGCTTTGTTTGAATGTGTTTCACTTTCATTTGATTCTAAAAGCTTTGATGAAAGTGTTGACTTTCATT  
TGACTCAATTAGCTTTGTTGAATTCATTTGATTTTCATTTGATTCAAAAAGCTTTGTTTGAATGTGTTTCACTTTCATT  
TGATTCTAAATCATTTGACTCAATTAGCTTTGTTGAATGCATTTTGACATTCATTTGATTCAAAAAGCTTTGTTTGAA  
TGTGTTTCACTTTCATTTGATTCTAAAAGCTTTGTTGAAAGTGTTGGCTTTCATTTGACTCAATTAGCATTGTGGAA  
TGCAATTAACCTTCATTTGATTCAAAAAGCTTTGTTTGAATGTATTTGACTTTAATTTGATTCTAAAAGCTTTGATGA  
AAGTGTTTGACTTTCATTTGACTCAATTAGCTTTGTTGAATTCATTTGATTTTCATTTGATTCAAAAAGCTTTGTTTGA  
ATGTGTTTCACTTTCATTTGATTCTAAAAGCTTTGTTGAAAGTGTTGGCTTTCATTTGACTCAATTAGCATTGTGGA  
ATGCAATTAACCTTCATTTGATTCAAAAAGCTTTGTTTGAATGTCTTTGACTTTAATTTGATTCTAAAAGCTTTGATG  
AAAGTGTTTGACTTTCATTTGACTCAATTAGCTTTGTTGAATTCATTTGATTTTCATTTGATTCAAAAAGCTTTGTTTG  
AATGTGTTTCACTTTCATTTGATTCTAAAAGCTTTGTTGAAAGTGTTGACTTTCATTTGACTCAATTAGCTTTGTTG  
AATTCATTTGATTTTCATTTGATTCAAAAAGCTTTGTTTGAATGTGTTTCACTTTCATTTGATTCTAAAAGCTTTGTTG  
AAAGTGTTTGACTTTCAATTA AAAACCTTTGTTTGAATGTGTTTGACTTTCATTTGATTCTAAAAGCTTTGTTGAAA  
GTGTTTGGCTTTCATTTGACTCAATTAGCATTGTGGAATGCAATTAACCTTCATTTGATTCAAAAAGCTTTGTTTGAA  
TGTGTTTCACTTTCATTTGATTCTAAAAGCTTTGTTGAAAGTGTTGGCTTTCATTTGACTCAATTAGCATTGTGGAA  
TGCAATTAACCTTCATTTGATTCAAAAAGCTTTGTTTGAATGTATTTGACTTTAATTTGATTCTAAAAGCTTTGATGA  
AAGTGTTTGACTTTCATTTGACTCAATTAGCTTTGTTGAATTCATTTGATTTTCATTTGATTCAAAAAGCTTTGTTTGA  
ATGTGTTTCACTTTCATTTGATTCTAAAAGCTTTGTTGAAAGTGTTTGACTTTCATTTGACTCAATTAGCATTGTGGA  
ATGCAATTAACCTTCATTTGATTCAAAAAGCTTTGTTTGAATGTATTTGACTTTAATTTGATTCTAAAAGCTTTGATG  
AAAGTGTTTGACTTTCATTTGACTCAATTAGCTTTGTTGAATTCATTTGATTTTCATTTGATTCAAAAAGCTTTGTTTG  
AATGTGTTTCACTTTCATTTGATTCTAAAAGCTTTGTTGAAAGTGTTTGACTTTCATTTGACTCAATTAGCTTTGTTG  
AATGCATTTGACATTCATTTGAATCAAAAAGCTTTGTTTAAATGTGTTTGACGTTTCATTTGATTCTAAAAGCTTAGAT  
GAAAGTGTTTGACTTTCATTTGACTCAATTAGCTTTATTGAATGCATTTGACATTCATTTGAATCAAAAAGCTTTGTT  
TAAATGTGTTTGACGTTTCATTTGATTCTAAAAGCTTAGATGAAAGTGTTTGACTTTCATTTGATTCTAAAAGCTTTGT  
TGAAAGTGTTTGGCTTTCATTTGACTCAATTAGCATTGTGGAATGCAATTAACCTTCATTTGATTCAAAAAGCTTTGC  
TTGAATGTATTTGACTTTAATTTGATTCTAAAAGCTTTGATGAAAGTGTTTGACTTTCATTTGACTCAATTAGCTTTG  
TTGAATGCATTTGATTTTCATTTGATTCAAAAAGCTTTGTTTGAATGTGTTTGACTTTCATTTGACTCAATTAGCTTTG  
TTGAATTCATTTGATTTTCATTTGATTCAAAAAGCTTTGTTTGAATGTGTTTGACTTTCATTTGATTCTAAAAGCTTTG  
TTGAAAGTGTTTGGCTTTCATTTGACTCAATTAGCATTGTGGAATGCAATTAACCTTCATTTGATTCAAAAAGCTTTG

ATTGAATGATTTGACTTTAATTTGATTCTAAAAGCTTTGATGAAAGTGTTTGACTTTCATTTGACTCAATCAGCTTT  
 GTTGAATGCATTTGACATTCATTTGAATCAAAAATCTTTGTTGAATTTTTTCACTTTCATTTGATTCTAACAGATT  
 TTTGT

Table of detected monomers

| Indices      | Period<br>Size | Copy<br>Number | Consensus<br>Size | Percent<br>Matches | Percent<br>Indels | Score | A  | C  | G  | T  | Entropy<br>(0-2) |
|--------------|----------------|----------------|-------------------|--------------------|-------------------|-------|----|----|----|----|------------------|
| 104--22309   | 118            | 188.0          | 117               | 90                 | 3                 | 23488 | 25 | 11 | 16 | 45 | 1.81             |
| 7481--7678   | 98             | 2.0            | 98                | 92                 | 0                 | 324   | 27 | 11 | 16 | 44 | 1.82             |
| 12915--13113 | 104            | 1.9            | 103               | 89                 | 3                 | 310   | 22 | 11 | 17 | 49 | 1.78             |
| 15025--15087 | 32             | 2.0            | 32                | 96                 | 0                 | 117   | 17 | 9  | 19 | 53 | 1.70             |
| 16539--16567 | 14             | 2.0            | 15                | 93                 | 6                 | 51    | 20 | 6  | 20 | 51 | 1.70             |
| 17308--17372 | 21             | 3.2            | 21                | 68                 | 12                | 64    | 21 | 12 | 16 | 49 | 1.79             |
| 17244--17426 | 20             | 9.2            | 20                | 67                 | 12                | 99    | 24 | 15 | 14 | 45 | 1.84             |
| 19242--19272 | 11             | 2.8            | 11                | 100                | 0                 | 62    | 19 | 9  | 9  | 61 | 1.54             |
| 19207--19313 | 50             | 2.1            | 50                | 89                 | 0                 | 160   | 22 | 12 | 14 | 51 | 1.74             |
| 20083--20188 | 55             | 1.9            | 54                | 83                 | 7                 | 133   | 25 | 14 | 13 | 47 | 1.80             |
| 20044--20232 | 95             | 2.0            | 94                | 95                 | 1                 | 342   | 25 | 13 | 13 | 47 | 1.79             |
| 20307--22105 | 39             | 45.9           | 37                | 68                 | 15                | 257   | 26 | 11 | 16 | 45 | 1.81             |

Consensus pattern (117 bp):

AGCTTTGTTGAATGTGTTTGACTTTCATTTGATTCAAAAAGCTTTGTTGAATGTGTTTGACTTTCATTTGATTCAAAA  
 AGCTTTGTTGAATGTGTTTGACTTTCATTTGATTCAAAA

Consensus pattern (98 bp):

TTTGACTCAATTAGCATTGTGGAATGCAATTAACATTCATTTGATTCAAAAAGCTTTGATTGAATGTATTTGACTTTC  
 ATTTGATTCTAAAAGCTTTG

Consensus pattern (103 bp):

TTTGTGTTGAATGTATTTCAATTTATTTGAGTCTAAAAGCTTTGTTGAAAGTGTTTGACTTTCATTTGACTCAATTAG  
 CTTTGTGTTGAATGCATTTAACTTAGG

Consensus pattern (32 bp):

TTTGTGAAAGTGTTTGACTTTCATTTGACTT

Consensus pattern (15 bp):

AGCTTTGTTGAATT

Consensus pattern (21 bp):

TTTGAATGCATTTGACTTTCA

Consensus pattern (20 bp):

CTTTCATTTGACTCAATTAG

Consensus pattern (11 bp):

TTCATTTGATT

Consensus pattern (50 bp):

TTTGATTTTCATTTGACTCAATTAGCTTTGTTGAATGCAGTTGACATTCA

Consensus pattern (54 bp):

TCATTTGACTCAAAAAGCTTTGTTGAATGATTTTCACATTCATTTGATTCTAAA

Consensus pattern (94 bp):

TCATTTGACTCAATTAGCTTTGTTGAATGCATTTGACATTCATTTGATTCAAAAAGCTTTGTTTG

AATGTGTTTCACTTTCATTTGATTCTAAA

Consensus pattern (37 bp):

AAAAAGCTTTGTTTGAATGTGTTTGACTTTCATATTA

BLAST alignments:

Chenopodium quinoa clone 12-13p repeat region sequence Sequence ID: [HM641822.1](#)

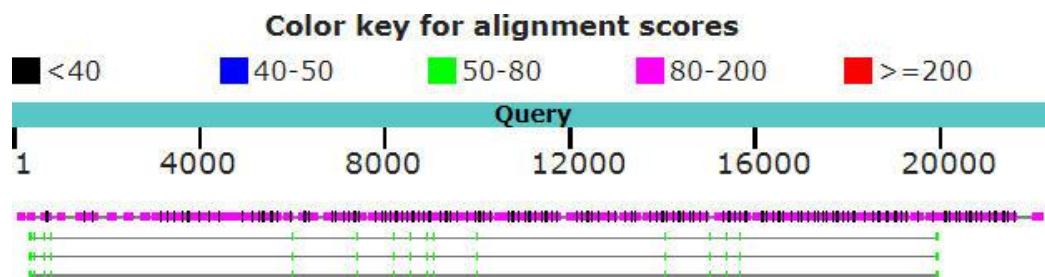

***C. bryonifolium***

CLUSTER 2

>CL2Contig17 (6990-40.3-281419)

TTTGATCGTGTGGACTTTTCATTTGATTCAAAAAGCTTTGTTTGTATGTGTTTGACTTTTCATTTGTTTCAATTAGCTTT

GTAGAATGCATTTGACTTTTCATTTGATTCAAACAGCTTTGTTTGAATGTGTTTGACTTTTCATTTGATTCAAAAAGCTT

TGTTTGAATGTGTTTGACTTTTCATTTGATTCAATTAGCTTTGTAGAATGCATTTGACTTTTCATTTGATTCAAATAGCTT





ACTTTCATTTGATTCAAAAAGCTTTGTTTGAATGTGTTTGACTTTCATTTGATTCAATTAGCATTGTTGATTGCATTTG  
 ACTTTCATTTGATTCAAAAAGCTTTGTTTGAATGTGTTTGACTTTCATTTGATTCAATTAGCTTTGTAGAATGCATTT  
 GACTTTCATTTGATTCAAATAGCTTTGTTTGAATGTGTTTGACTTTCATTTGATTCAAAAAGCTTTGTTTGAATGTGT  
 TTGACTTTCATTTGATTCAAATAGCTTTGTTTGAATGTGTTTGACTTTCATTTGATTCAAATAGCTTTGTTTGAATGTG  
 TTTGACTTTCATTTGATTCAATTAGCTTTGTAGAATGCATTTGACTTTCATTTGATTCAAATAGCTTTGTTTGAATGTG  
 TTTGACTTTCATTTGATTCAAATAGCTTTGTTTGAATGTGTTTGACTTTCATTTGATTCAATTAGCTTTGTTTGAATGT  
 GTTTGACTTTCATTTGATTAAATTAGCTTTGTTTGAATGTGTTTGACTTTCATTTGATTCAATTAGCTTTGTTGAATGC  
 ATTTGACTTTCATTTGATTCAAAAAGCTTTGTTTGAATGTGTTTACTTTCATTTGATTAAAAAAGCTTTGCTTTAAT  
 GTGTTTGACTTTTATTTGTTTCAATGAGCTTTGTTTGAGTGTGTTTGACTTTTATATGATTCAATTAGCTTTGTTGAAT  
 GCATTTGACTTTCATTTGATTCAAAAAGCTTTGTTTGAATGTGTTTGACTTTCTTAAATGTGTTGGACTTTTCATTTG  
 ATTCATTAGCTTTGTTTGAATGTGTTTGACTTTCATTTGATTAAAAAAGCTTTGCTTTAATGTGTTTGACTTTTATT  
 TGTTCATGAGCTTTGTTTGAGTGTGTTTGACTTTTATTTGATTCAATTAGCTTTGTTGAATGCATTTGACTTTCATT  
 TGATTCAAAAAGCTTTGTTTGAATGTGTTTGACTTTCATTTGATTCAATTAGCTTTGTTTGAATGTGTTTGACTTTCAT  
 TTGATTCAATTAGCTTTGTAGAATGCATTTGACTTTCATTTGATTGAAATAGCTTTGTTTGAATGTGTTTGACTATCA  
 TTTGATTCAATTAGCTTTGTTTAAATGTGTTTGACTTTCATTTGATTCAATTGCTTTGTTGATTTTATTTGACTTTCAT  
 TTAATTCAAAAACATTGTTTGAAGTGATTGACTTTCATTTGAATCATTTAGCATTGTTGAATGCATTTGACTTTCAT  
 GATTCAATTTGCTTTGTTGAATGCATTTGACTTTCATTTGATTCAAAATACTTTGTTTGAATGTGTTTGACTTTCATT  
 GATTCAATTAGCTTTGTAGAATGCATTTGACTTTCATTTGATTCAAAAAGCTTTGTTTGAATGTGTTTGACTTTCATT  
 TGATTCAAATAGCATTGTTGAATGCAATTGACTGTCATTTAATTTAAAAAGCTTTGTTTGAATGTGTTTGACTTTCAT  
 GTGATTCAATTAGCTTTGTAGAATGCATTTGACTTTCATTTGATTCAATAGCTTTGATTGAAATGTGTTTGACTTTC  
 ATTTGATTCAAAAAGCTTTGTTGAATGTGTTTGACTTTCATTTGATTCAAAAATCTTTGTTTGAATGTGTTTGACTTT  
 CATTTGATTCAATTAGCTTTGTTAGAATGCATTTGACTTTCATTTGATTCAAAAAGCTTTGATTGACTGT

Table of detected monomers

| Indices    | Period<br>Size | Copy<br>Number | Consensus<br>Size | Percent<br>Matches | Percent<br>Indels | Score | A  | C  | G  | T  | Entropy<br>(0-2) |
|------------|----------------|----------------|-------------------|--------------------|-------------------|-------|----|----|----|----|------------------|
| 8--6986    | 79             | 88.0           | 79                | 91                 | 2                 | 9793  | 24 | 11 | 16 | 48 | 1.78             |
| 8--6986    | 119            | 58.7           | 120               | 88                 | 3                 | 9631  | 24 | 11 | 16 | 48 | 1.78             |
| 4483--4701 | 67             | 3.1            | 67                | 80                 | 15                | 269   | 25 | 12 | 15 | 46 | 1.81             |
| 4556--6986 | 40             | 60.8           | 40                | 83                 | 4                 | 2743  | 24 | 10 | 16 | 48 | 1.78             |
| 5939--6131 | 101            | 1.9            | 99                | 88                 | 5                 | 291   | 22 | 9  | 17 | 50 | 1.75             |

|            |    |     |    |    |    |    |    |    |    |    |      |
|------------|----|-----|----|----|----|----|----|----|----|----|------|
| 6506--6563 | 19 | 3.1 | 19 | 71 | 14 | 66 | 20 | 12 | 17 | 50 | 1.78 |
|------------|----|-----|----|----|----|----|----|----|----|----|------|

Consensus pattern (79 bp):

GTGTTTGACTTTCATTTGATTCAATTAGCTTTGTTGAATGCATTTGACTTTCATTTGATTCAAATAGCTTTGTTTGAAT

Consensus pattern (120 bp):

GTGTTTGACTTTCATTTGATTCAAATAGCTTTGTTTGAATGTGTTTGACTTTCATTTGATTCAAATAGCTTTGTTTGAAT  
TGTGTTTGACTTTCATTTGATTCAAATAGCTTTGTTTGAAT

Consensus pattern (67 bp):

GCATTTGACTTTCATTTGATTCAAAAAGCTTTGTTTGAATGTGTTTGACTTTCATTTGATTCAATTA

Consensus pattern (40 bp):

GACTTTCATTTGATTCAAATAGCTTTGTTTGAATGTGTTT

Consensus pattern (99 bp):

TGTGTTGGACTTTTATATGATTCAATTAGCTTTGTTGAATGCATTTGACTTTCATTTGATTAAAAAAGCTTTGCTTT  
AATGTGTTTGACTTTCTTAAA

Consensus pattern (19 bp):

TTGTTGAATGCATTTGACT

BLAST alignments:

Chenopodium quinoa clone 12-13p repeat region sequence Sequence ID: [HM641822.1](#)

Beta corolliflora minisatellite DNA, clone pBC1447 Sequence ID: [AJ288880.1](#)

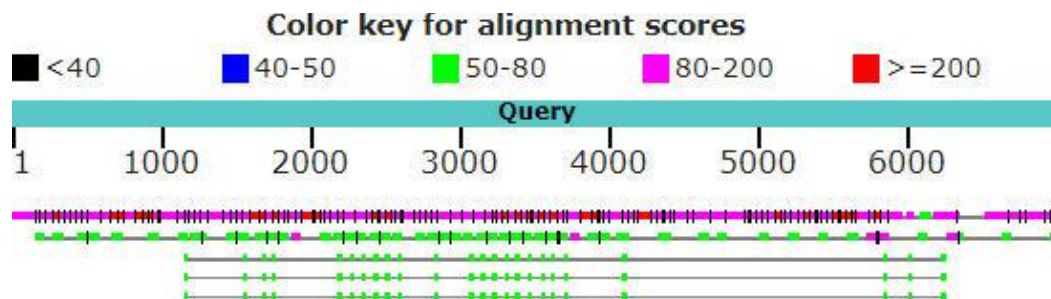

*C. iljinii*

Cluster 28

>CL28Contig57 (6247-278.0-1736891)

AAATGCATTCAAACAAAACCTTTTTAAATCAAATGAAAATCAAACACAATCAAACAAAGAATCATGAATAAAATGAA  
AGTCAAACACATTCAAACAAAGCTTTTTAAATCAAATGAAAGTCAAATGCATCAATTGAAAATCAAATACATTAA  
ACAAAGCTTTTTGATTCAAATGAAATTCAAGCACATTTAAACAAAGATTCTTGAATAAAATGAAAGTCAAACACATT  
CAAACAAAGCTTTTTAAATCAAATGAAAGTCAAATGCATTCAACAAATCTAATTGAGTCAAATTAAGTCAAACA  
CATTCAAACAAAGCTTTTTGAATCAAATGAAAGTCAAATGCATTCAACAAAGCTTTTGAATCAAATGAAAGTCAA  
CACATTCAAACAGAGCTTTTTGAATCAAATGAAAGTCAAATGCATTCAACAAAGCTAATTGAGTCAAATGAAAGTC  
AAACACATTCAAACAAAGCTTTTTGAATCAAATGAAAGTCAAATGCATTCAACAAAGCTAATTGAGTCAAATGAAA  
GTCAAACACATTCAAACAAAGCTTTATAAATCAAATGAATGTCAAATGCATTCTACAAAGCTAATTGAGTCAAATT  
AAAGTCAATAACATTCAAACAAACCGTTTATAATCAAATGAAAGTCAAATGCATTCAACAAAGCTTTTTGAATCAA  
TGAAAGTCAAATGCATTCAACAAACCTTTTTGAATCAAATGAAAGTCAAATGCATTCAACAAAGCTAATTGAGTCA  
AATGAAAGTCAAACACATTCAAACAAAGCTTTATAAATCAAATGAATGTCAAATGCATTCTACAAAGCTAATTGA  
GTCAAATTAAGTCAATAACATTCAAACAAACCGTTTATAATCAAATGAAAGTCAAACACATTCAAACAGAGCTTTT  
TGAATCAAATGAAAGTCAAATGCATTCAACAAAGCTAATTGAGTCAAATGAAAGTCAAACACATTCAAACAAAGCT  
TTATAAATCAAATGAATGTCAAATGCATTCTACAAAGCTAATTGAGTCAAATTAAGTCAATAACATTCAAACAA  
CCGTTTATAATCAAATGAAAGTCAAATGCATTCAACAAAGCTTTTTGAATCAAATGAAAGTCAAATGCATTCAACAA  
ACCTTTTTGAATCAAATGAAAGTTGAATACATTCAAACAAAGCTTTTTGAATCAAATGAAAGTCAAATACATTCAAC  
AAATCTTTTTGAATCAAATGAAATTCAAGCACATTCAAACAAAGATTCTGAAAGACAAACACATTCAAACAAATCTT  
TTTGAATAAAATGAAAGTCAAATGCATTCAACAAAGCTAATTGAGTCAAATGAAAGTCAAACACATTCAAACAAAG  
CTTTATAAATCAAATGAATGTCAAATGCATTCTACAAAGCTAATTGAGTCAAATTAAGTCAATAACATTCAAACA  
AACCGTTTATAATCAAATGAAAGTCAAATGCATTCAACAAAGCTTTTTGAATCAAATGAAAGTCAAATGCATTCAAC  
AAACCTTTTTGAATCAAATGAAAGTTGAATACATTCAAACAAAGCTTTTTGAATCAAATGAAAGTCAAATACATTCA  
ACAAAGCTTTTTGAATCAAATGAAATTCAAGCACATTCAAACAAAGATTCTTGAATAAAATGAAAGACAAACACAT  
TCAAACAAAGCTTTTTGAATAAAATGAAAGTCAAATGCATTCAACAAAGCTAATTGAGTCAAATGAAAGTCAAACA  
CATTCAAACAAAGCTTTTTAAATCAAATGAAAGTCAAATACATTCAACAAAGCTAATTCAGTAAATAAAGTCA  
AACACATTCAAACAAAGCTTTTTGATCAAATGAAAGTCAAATGCATTCAACAAACCTTTTTGAATCAAATGAAAGT  
TGAATACATTCAAACAAAGCTTTTTGAATCAAATGAAAGTCAAATACATTCAACAAAGCTTTTTGAATCAAATGAAA  
TTCAAGCACATTCAAACAAAGATTCTTGAATAAAATGAAAGACAAACACATTCAAACAAAGCTTTTTGAATAAAAT  
GAAAGTCAAATGCATTCAACAAAGCTAATTGAGTCAAATGAAAGTCAAACACATTCAAACAAAGCTTTTTAAATCA  
AATGAAAGTCAAATGTATTAACAAAGCTAATTGAGTCAAATTAAGTCAAACACATTCAAACAAAGCTTTTTGA  
ATCAAATGAAAGTCAAATGCATTCAACAAATTTTTTAAATCAAATGAAAGTCAAATGCATTCAACAAATCTTTTG  
AATTAATGAGTTGAATACATTCAAACAATGATTTTTAAATCAAATGAAAGTCAAATACATTCAACAAAGCTTTTTG  
AATCAAATGAAATTCAAGCACATTCAAACAAAGATTCTTGAATAAAATGAAAGACAAACACATTCAAACAAAGCTT



TTGAATAAAATGAAAGTCAAATGCATTCAACAAAGCTAATTGAGTCAAATGAAAGTCAAACACATTCAAACAAAG  
CTTTTTAAATCAAATGAAAGTCAAATGTATTAACAAAGCTAATTGAGTCAAATTAAAGTCAAACACATTCAAACA  
AAGCTTTTTGAATAAAATGAAAGTCAAATGCATTCAACAAAGCTAATTGAGTCAAATGAAAGTCAAACACATTCAA  
ACAAAGCTTTTTAAATCAAATGAAAGTCAAATGTATTAACAAAGCTAATTGAGTCAAATTAAAGTCAAACACAT  
TCAAACAAAGCTTTTTGAATCAAATGAAAGTCAAATGCATTCAACAAAAGTTTTTGAACCAAATGAATGTCAAATG  
CATTCAAACAAAGCTTTTTAAATCAAATGAAAGTCAAATGTATTAACAAAGCTAATTGAGTCAAATTAAAGTCA  
AACACATTCAAACAAAGCTTTTTGAATCAAATGAAAGTCAAATGCATTCAACAAAAGTTTTTGAACCAAATGAATG  
TCAAATGCATTCAACAAAGATTTTTAAATCAAAGAAAGTCAAATGTATTAACAAAGCTAATTGAGTCAAATTA  
AAGTCAAACACATTCAAACAAAGCTTTTTGAATCAAATGAAAGTCAAATGCATTCAACAAAAGTTTTTGAACCAA  
TGAATGTCAAATGCATTCAACAAAGATTTTTAAATCAAAGAAAGTCAAATGTATTAACAAAGTTAATTGAGTC  
AAATTAAAGTCAAACACATTCAAAAAAGCTTTTTGAATCAAATGAATGTCAAATGCATTCAACAAAGCTTTTTAAA  
TCAAATGAAAGTCAAATGCATTCAACAAATCTTTTAGAATCAAATGAAAGTTAAACATATTCAAACAAAGCTTTT  
TGAATCAAATGAAGGTAAAATGCATTTAACAAAGCTTTTTGGATCAAACGGAAGTCAAGCACATTCAAACAAAGAT  
ACGTGAATAAAATGAAGGTCAAACACATTCAAACAAAGCTTTTTGAACCAAATGAATGTCAAATGCATTCAACAAA  
GATTTTTAAATCAAAGAAAGTCAAATGTATTAACAAAGTTAATTGAGTCAAATTAAAGTCAAACACATTCAAAC  
AAAAGCTTTTTGAATCAAATGAATGTCAAATGCATTCAACAAAGCTTTTTAAATCAAATGAAAGTCAAATGCATTCA  
ACAAATCTTTTAGAATCAAATGAAAGTTAAACATATTCAAACAAAGCTTTTTGAATCAAATGAAGGTAAAATGCATT  
TAACAAAGCTTTTTGGATCAAACGGAAGTCAAGCACATTCAAACAAAGATACGTGAATAAAATGAAGGTCAAACA  
CATTCAAACAAAGCTTTTTGAATCAATTGAAAGTCAAATGAATTCAACAAAGCTAATTGAGTCTAATGAAAGTCAA  
ACACATTCAAACAAAGCTTTTCAAATCAAATGAAAGTCAAATGTATTAATAAAGCTAATTGAGTCAAATTAAAG  
TCAAACACCTTCAAACAAAGCTTTTTGAATCAAATGAAAGTCAAATCCATTCAACAAAAGTTTTTGAATCAAATGAA  
AGTCAAACACATTCAAACAAAGCTTTTTGAATCAATTGAAAGTCAAATGAATTCAACAAAGCTAATTGAGTCTAAT  
GAAAGTCAAACACATTCAAACAAAGCTTTTCAAATCAAATGAAAGTCAAATGTATTAATAAAGCTAATTGAGTC  
AAATTAAAGTCAAACACCTTCAAACAAAGCTTTTTGAATCAAATGAAAGTCAAATCCATTCAACAAAAGTTTTTGAA  
TCAAATGAAAGTCAAATGCATTCAAACAAATCTTTTAAATCAAATGAAAGTCAAAAAGTATTAACAAAGTTAATT  
GAGTCAAACACATTCAAACAAAGCTTTTTGAATCAATTGAAAGTCAAATGAATTCAACAAAGCTAATTGAGTCTAA  
TGAAAATCAAACACATTCAAACAAAGCTTTTTAAATCAAATGAAAGTCAAATGTATTAATAAAGCTAATTGAGT  
CAAATTAAAGTCAAACACATTCAAACAAAGCTTTTTGAATCAATTGAAAGTCAAATGAATTCAACAAAGCTAATTG  
AGTCTAATGAAAGTCAAACACATTCAAACAAAGCTTTTCAAATCAAATGAAAGTCAAATGTATTAATAAAGCTA  
ATTGAGTCAAATTAAAGTCAAACACCTTCAAACAAAGCTTTTTGAATCAAATGAAAGTCAAATCCATTCAACAAAA  
GTTTTTGAATCAAATGAAAGTCAAATGCATTCAAACAAATCTTTTAAATCAAATGAAAGTCAAACACATTCAAACA  
AAGATTCATGAATAAAATGAAAGTCAAACACATTCAAACAAAGCTTTTTAAATCAAATGAAAGTCAAATGCATTCA

AACAAATCTAATTGAGTCAAATTAAGTCAAACACATTCAAACAAAGCTTTTGAATCAAATGAAAGTCAAATGCA  
 TTCAACAAAGCTTTTGAATCAAATGAAAGTCAAACACATTCAAACAGAGCTTTTGAATCAAATGAAAGTCAAATG  
 CATTCAACAAAGCTAATTGAGTCAAATGAAAGTCAAACACATTCAAACAAGCTTTTGAATCAAATGAAAGTCAAA  
 TGCATTCAACAAATCTTTTAAATCAAATGAAAGTCAAACACATTCAAACAAAGATTCTTGAATAAAATGAAAGTCA  
 AACACATTCAAACAAAGCTTTTGAATCAAATGAAAGTTAAATGCATTCAACAAATCTAATTGAGTCAAATTA  
 GTCAAACACATTCAAACAAAGCATTTTGAATCAAATGAAAGTCAAATGCATTCAACAAAGCTTTTGAATCAAATG  
 AAAGTCAAACACATTCAAACAAAGCTTTTGAATCAAATGAAAGTCAAACACATTCAAACAAAGCTTTTAAATCAA  
 ATGAAAGTCAAAATGCATTCAACAAATCTAATTGAGTCAAATTAAGTCAAACACATTCAAACAAAGCTTTTGAAT  
 CAAATGAAAGTCAAATGCATAAACAAAGCTTTTGAATCAAATGAATTCAAACACATTCAAACAGAGCTTTTGAAT  
 CAAATGAAAGTCAAATGCATTCAACAAAGCTAATTGAGTCAAATGAAAGTCAAACACATTCAAACAAAGCTTTATA  
 AATCAAATGAATGTCAAAATGCATTCTACAAAGCTAATTGAGTCAAATTAAGTCAATAACAATCAAACAAACCGT  
 TTATAATCAAATGAAAGTCAAATGCATTCAAACAAACCGTTTATAATCAAATGAAAGTCAAATGCATTCAACAAAG  
 TTTTGAATCAAATGAAAGTCAAATGCATTCAACAAACCTTTTGAATCAAATGAAAGTTGAATACATTCAAACAA  
 AGCTTTTGAATCAAATGAAAGTCAAATACATTCAACAAAGCTTTTGAATCAAATGAAATCAAGCACATTCAAAC  
 AAAGATTCTTGAATAAAATGAAAGACAAACACATTCAAACAAAGCTTTTGAATAAAATGAAAGTCAAATGCATTG  
 AACAAAGCTAATTGAGTCAAATGAAAGTCAAACACATTCAAACAAAGCTTTTAAATCAAATGAAAGTCAAAATGT  
 ATTAACAAAGCTAATTGAGTCAAATTAAGTCAAACACATTCAAACAAATCCTTCCATGGTGATTGATTTGCTG  
 GTTTTCTTCAGCTTAATCGGTTTCAATGGCTCGAAAGAAGAAACAATCCACCCCATACCTCA

Table of detected monomers

| Indices   | Period<br>Size | Copy<br>Number | Consensus<br>Size | Percent<br>Matches | Percent<br>Indels | Score | A  | C  | G  | T  | Entropy<br>(0-2) |
|-----------|----------------|----------------|-------------------|--------------------|-------------------|-------|----|----|----|----|------------------|
| 6--123    | 40             | 3.0            | 40                | 79                 | 0                 | 155   | 55 | 16 | 6  | 22 | 1.64             |
| 128--6156 | 40             | 152.8          | 40                | 76                 | 6                 | 5035  | 47 | 15 | 10 | 26 | 1.78             |
| 1--742    | 158            | 4.9            | 144               | 79                 | 11                | 516   | 48 | 15 | 10 | 25 | 1.77             |
| 128--6156 | 79             | 76.4           | 80                | 83                 | 5                 | 6141  | 47 | 15 | 10 | 26 | 1.78             |
| 128--6156 | 159            | 38.2           | 158               | 84                 | 4                 | 6076  | 47 | 15 | 10 | 26 | 1.78             |

Consensus pattern (40 bp):

CATTCAAACAAAGCTTTTAAATCAAATGAAAGTCAAACA

Consensus pattern (40 bp):

ATCAAATGAAAGTCAAACACATTTAAACAAAGCTTTTTGA

Consensus pattern (144 bp):

AAATACATTCAAACAAAGCTTTTTGAATCAAATGAAATCAAACACATTAAACAAAGATTCTTGAATAAAATGAAA  
GTCAAACACATTCAAACAAAGCTTTTTAAATCAAATGAAAGTCAAAATGCATCTAATTGACAAATTAC

Consensus pattern (80 bp):

ATCAAATGAAAGTCAAACACATTCAAACAAAGCTTTTTGAATCAAATGAAAGTCAAATACATTCAAACAAAGCTTTT  
TGA

Consensus pattern (158 bp):

ATCAAATGAAAGTCAAATACATTCAACAAAGCTTTTTGAATCAAATGAAAGTCAAATACATTCAAACAAAGCTTTTT  
GAATCAAATGAAAGTCAAACACATTCAAACAAAGCTTTTTGAATCAAATGAAAGTCAAAACATTCAAACAAAGCTT  
TTGA

BLAST alignments:

Chenopodium quinoa clone 12-13p repeat region sequence. Sequence ID: [HM641822.1](#)

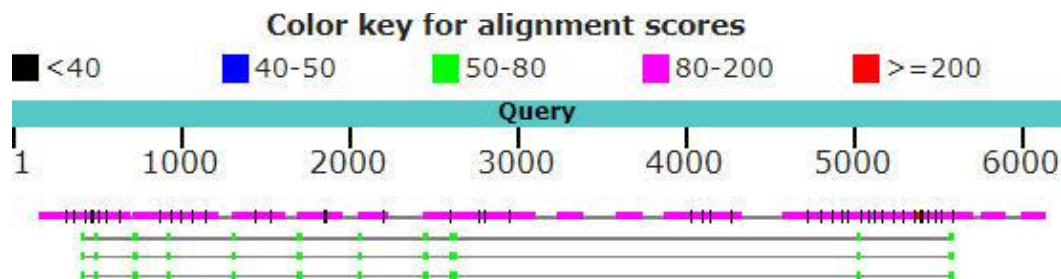

### *C. vulvaria*

#### CLUSTER 28

>CL28Contig18 (3488-247.5-863128)

AATCTCACATACAAACAAATCTAATGTATCAAATGAAAGTCAGACACATTCAAACAAAGCTGATCTTATCAAATGA  
AAGTCAAACACATTCAAACAAAGGTAATACAATCAAATGAATTCAACAAAGCTAATCACTCAAATGAAAGTCAAA  
TGCGTTTAACAAAGCTAAATGAATCAAATGAAAGTCAAACACATTTAATCAAAGCTAATTAATCAAATGAAAGTC  
AAATGCATTTAAGAAAGCTAATTGAATTAAATGAAAGTCAAACACATTCAAGCAAAGATAATTAAATCAAATGAAA  
GTCAAATGAGCTCAACAAAGGTAGTTGGATCAAATGATAGTCAAACACATTCAAACAAAGCTAATTGAATCTAAAC  
ACATTCAAACACAGCTAATTGAATCAAATGAAAGTCAAATGCATTCTACAAAGCTAATCACTCAAATGAAAGTCA  
AATGCCTTCAACAAAGATAAATGAATCAAATGAAATTCAAACACATTCAATTAAAGCTAATAGAATCAAATGTAAG  
TTAAATGCATTCAACAAACCTATGTCACTCAAATGAAAGTCAAATGCATTCTACAAAGATAAATGAATCAAATGAA  
AGTCTAACACATTCAATCAAAGCTAATTGCATCAAATGAAAGTCAAACACATTCAAATAACGCTAATTGTATCGA

ATGAAAGTGAAAGAAATTCAAACAAAGATATTTAAATCAAATGCATTCAACAAAGCTAATTGAATCAAATGAAAGT  
CAAAATCATTTAAACAAAGCTAATTAATAAAAAATAAAAGTCAAAAACATACAAACAAATCTAATGTAATCAAATGA  
AAGTCAGATGCATTCAACAAAGCAAATTAATCAAATGAAAGTCAAACCTATTCAAACAAAGCTAATTGAATTAAA  
TGATAGTCAAACACATTAAACAAAGCTAATCGAATCAAATGAAAGTCAAACACATTCAAACAAAGCTGATCTTAT  
CAAATGAAAGTCAAACACATTCAAACAAAGCTAATACAATCAAATGAATTCAACAAAGCTAATTCCTCAAATGAA  
AGTCAAATGCACTCAACAAATAAAAGACTAACACATTTAATCAAAGCTAATTGAATCAAATGAAGAACAATGCATT  
TAATAAAGCTAATTGAATTAAATGAAAAATCAAATCAAAAAAAGATAATTGAATCAAATCAAAGTCAAATGCATTAA  
ACAAAGCTAATTGAATCAAATGATAGTCAAACACATTCAAACAAAGCTAACAAATCAAATGAAAGTCATATGCAT  
TCACGAAAGCTAATTGAATCAAATGATAGTCAAACATATTCAAACAAAGGTAATTTAATCAAATGAAAGAAAAACA  
CATTCAAACAAAGCGAATTCTCTCAAATGAAAGTCAAATGCATTCAACAATGCTAATTGAATCAAATGATAGTCAA  
ACACTTTCAAACAAAGCTAATTGAATCAAATGAAAGTCAGACACATTCAAACAAAGCTGATTAAATCAAATGACGG  
TCAAACACATTCAAAAAACCTTATTGAATCAAATGATAGTCAAACACTTTCAAACAAAGCTAATTGAATAGATTAA  
AAGTCAATTGCATTCAACAAATCTAATTGAATCAAATGATAGTCAATCACATTCAAACAAAGATAATTGAATCAAAT  
GAAAGTTAAACACAATCAAAGAAAATTATAGAATCAACTGAAAGTCAAATGCGTTCAACAAAGCTAATTCCTCA  
AATCAAAGTCAAATGCTTTCAATAAAGATAAATGAATCAAATGCAAGTCAAGGACATTCAACCAAAGCTAATTGAT  
CAAATGAAAGTCAAATGCATTTAAATAAAGCTAGTTGAACCAAATGGTAGTCAAACACATTAAACAAAGCTAATT  
AAATCAATTTTTTAGTCCATTGCATTCAATCTAATTGAATCAAATGATAGTTAAACACATTCAAACATGGGTA  
ATTGAATCAAATGAAATTTAAACGCAATCAAACAAAGCAAATTGAATCAAACCAAATTTATGGATTCAAATGAGAG  
TCATACACATTCTATCAAAGCTAAATGAATCAAATGAAAGTTAAACACAATCAAAGAAAATTATAGAATCAACTG  
AAAGTCAAATGCGTTCAACAAAGCTAATTCCTCAAATCAAAGTCAAATGCTTTCAATAAAGATAAATGAATCAAA  
TGCAAGTCAAGGACATTCAACCAAAGCTAATTGATCAAATGAAAGTCAAATGCATTTAAATAAAGCTAGTTGAACC  
AAATGGTAGTCAAACACATTAAACAAAGCTAATTAAATCAATTTTTTAGTCCATTGCATTCAATCTAATTGA  
ATCAAATGATAGTTAAACACATTCAAACATGGGTAATTGAATCGAATGAAAGTTAAACACAATCAAACAAAATTA  
TAGAATCAAATGAGAGTCATACACATTCAATCAAAGCTAAATGCATCAAATGAAAGTCAAACACATTCAAAAAAAG  
CAAATTGAATCTAATGAAAGTCAAAGAAATTCAAACAAAGATATTTGAATCAAATAAAAGTCAAATGCATTCAACA  
AAGCTAATTGAATCAAATGAAAGTCAAATCATTCAAACAAAGATATTTGAATCAAATGAAAGTCAAACAGATTTA  
AACAAAGCTAATTAAATCAAATGAAATTCAAACACAATCAAACCAAATTAAGAATCAAATGGAAGTCAAATGCA  
TTCAACAGTGCTAATTCCTCAAATGAAAGTCAAATGCATTCAACAAAGCTAAATGAATCAAATGAAAGTCAAACA  
CATTCAATCAAAGCTAATTGCATCAAATGAAAGTCAAACCTATTCAAATGACGCTAAATTGTATCAAATGAAAGTC  
AAAGAAATTCAAACAAAGATATTTGAATCAAATAAAAGTCAAATGCATTCAACAAAGCTAATTGAATCAAATGAAA  
GTCAAATCATTCAAACAAAGATATTTGAATCAAATGAAAGTCAAACAGATTTAACAAAGCTAATTAAATCAAAT  
GAAATTCAAACACAATCAAACCAAATTAAGAATCAAATGGAAGTCAAATGCATTCAACAGTGCTAATTCCTCA

AATGAAAGTCAAATGCATTCAACAAAGCTAAATGAATCAAATGAAAGTCAAACACATTCAATAAAAACTAACTGCA  
TCAAATGAAAGACAAAGTATTAACAAAGCTAATCAAATAAAATGAAAGTTAAATGCATTCAAAAGTGCTAGTTC  
ACTCAAATGCAATCAACAAAGCTAAACGAATCGAATGAAAGTCAAACACATTCAAACAAACCTAATAGAATCAAAT  
GTAAGTTAAATAAATTCAAACAATGATATTTGAATCAAATAAAAGTCAAATGCATTCAACAGTGAAATAATAGAAT  
CAAATGGAAGTCAATTGCATTCAACAGTGCTAATCACTCAAATGAAAGTCAAATGCATTCAAC

Table of detected monomers

| Indices    | Period<br>Size | Copy<br>Number | Consensus<br>Size | Percent<br>Matches | Percent<br>Indels | Score | A  | C  | G  | T  | Entropy<br>(0-2) |
|------------|----------------|----------------|-------------------|--------------------|-------------------|-------|----|----|----|----|------------------|
| 6--117     | 40             | 2.8            | 40                | 85                 | 4                 | 138   | 50 | 18 | 9  | 20 | 1.75             |
| 88--145    | 28             | 2.0            | 29                | 86                 | 3                 | 82    | 51 | 17 | 8  | 22 | 1.72             |
| 117--3488  | 79             | 42.6           | 78                | 71                 | 11                | 1595  | 49 | 15 | 11 | 23 | 1.77             |
| 117--3487  | 40             | 85.2           | 40                | 72                 | 9                 | 1837  | 49 | 15 | 11 | 23 | 1.77             |
| 347--405   | 30             | 2.0            | 30                | 96                 | 0                 | 109   | 49 | 22 | 6  | 22 | 1.73             |
| 355--419   | 30             | 2.2            | 30                | 83                 | 5                 | 78    | 50 | 18 | 9  | 21 | 1.74             |
| 700--755   | 28             | 2.0            | 29                | 85                 | 3                 | 78    | 50 | 14 | 8  | 26 | 1.72             |
| 721--3260  | 119            | 21.1           | 118               | 70                 | 12                | 589   | 49 | 15 | 10 | 23 | 1.76             |
| 1007--1064 | 28             | 2.0            | 29                | 90                 | 3                 | 91    | 51 | 18 | 6  | 22 | 1.70             |
| 1391--3054 | 416            | 4.1            | 397               | 82                 | 7                 | 1572  | 48 | 15 | 11 | 24 | 1.78             |
| 2071--3488 | 358            | 4.0            | 355               | 84                 | 4                 | 1509  | 49 | 15 | 11 | 23 | 1.77             |
| 3381--3488 | 39             | 2.7            | 40                | 84                 | 2                 | 137   | 46 | 16 | 12 | 24 | 1.82             |

Consensus pattern (40 bp):

CACATTCAAACAAAGCTAATCTAATCAAATGAAAGTCAAA

Consensus pattern (29 bp):

ATTCAAACAAAGCTAATACAATCAAATGA

Consensus pattern (78 bp):

ATTCAACAAAGCTAATTGAATCAAATGAAAGTCAAATGCATTCAACAAAGCTAATTGAATCAAATGAAAGTCAAAC  
AC

Consensus pattern (40 bp):

ATTCAAACAAAGCTAATTGAATCAAATGAAAGTCAAACAC

Consensus pattern (30 bp):

AAACACATTCAAACAAAGCTAATTGAATCT

Consensus pattern (30 bp):

TCAAACAAAGCTAATTGAATCTAAACAAAG

Consensus pattern (29 bp):

ATTCAAACAAAGATAATTAAATCAAATGC

Consensus pattern (118 bp):

TCAAATGCATTCAACAAAGCTAATTAATCAAATGAAAGTCAAATCATTCAAACAAAGCTAATTAAATAAAATAAA  
AGTCAAAAACATTAAACAAAGCTAATCGAATCAAATGAAAG

Consensus pattern (29 bp):

ATTCAAACAAAGCTAATACAATCAAATGA

Consensus pattern (397 bp):

TCAAATGCAAGTCAAGGACATTCAACCAAAGCTAATTGATCAAATGAAAGTCAAATGCATTAAATAAAAGCTAGTT  
GAACCAAATGGTAGTCAAACACATTAACCAAAGCTAATTAAATCAATTTTTTAGTCCATTGCATTCAATCTA  
ATTGAATCAAATGATAGTTAAACACATTCAAACATGGGTAATTGAATCGAATGAAAGTCAAACACAATCAAACAAA  
ACTTATAGAATCAAATGAGAGTCATACACATTCAATCAAAGCTAAATGAATCAAATGAAAGTTAAACACAATCAAA  
GAAACTTATAGAATCAACTGAAAGTCAAATGCGTTCAACAAAGCTAATTCATTCAAATCAAAGTCAAATGCTTTC  
AATAAAGATAAATGAA

Consensus pattern (355 bp):

CAAAGCTAAATGAATCAAATGAAAGTCAAACACATTCAATCAAACTAATTGCATCAAATGAAAGTCAAACCTATT  
CAAAAAAGCTAATTGAATCAAATGAAAGTCAAATGAATTCAACAAAGATATTTGAATCAAATAAAAGTCAAATGCA  
TTCAACAAAGCTAATTGAATCAAATGAAAGTCAAATCATTCAAACAAAGATATTTGAATCAAATGAAAGTCAAAC  
AGATTTAAACAAAGCTAATTAAATCAAATGAAAGTCAAACACAATCAAACCAAATAATAGAATCAAATGGAAGTC  
AAATGCATTCAACAGTGCTAATTCATTCAAATGAAAGTCAAATGCATTCAA

Consensus pattern (40 bp):

AATCAAATGAAAGTCAAATGCATTCAACAGTGAATAATAC

BLAST alignments:

Chenopodium quinoa clone 12-13p repeat region sequence. Sequence ID: [HM641822.1](#)

Beta corolliflora minisatellite DNA, clone pBC1447 Sequence ID: [AJ288880.1](#)

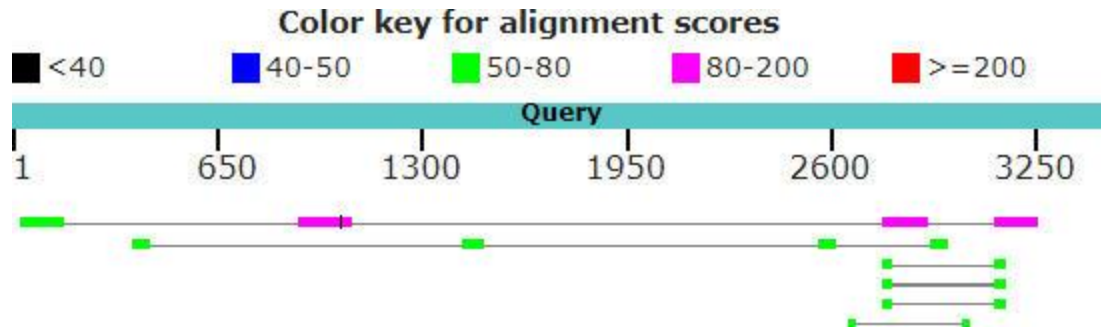

## CLUSTER 94

&gt;CL94Contig11 (2506-87.2-218590)

ATCTAATTAATAATATGAAGGTCAAAGACGTTGAAAGAAAGTTCATTGAATCAAACGAAACTGAAATGTTTTCAA  
 CAAAGCCATTTTAGTCAAAATGAAAGTCAAACACAATGATATAAAGTTAATTAAATCAAATGAAAGTCAAATGACT  
 TCAACAAAGGCTAATTGAATCAATTGAAAGTCAAATGCATTCAACAATGCTAATTGAGTCAAATGAACTTAAATA  
 CATTGAAACACATTGAAACAAAGTTAATTGAATAAAATGAAAGTCAAATGCACTCAACAAAGCAAATTGAATAAAA  
 TGAAAATCAAAAACATTGAAGCCAAGTTAATTGAATAAAGCATAAGTAAACACATTAAAAACAAAGTTAATTGAA  
 TCAAATGAAAGTCAAATGATTTTAAAAAAGCTAATTGAATCCAATGACAGTCAAACACCTTGAAACAGAGTTAATT  
 GAATCAAATAAATCTCAAATGCTTTCAACAAAGCTAATTGAATCAAATGAAAGTCAAATGCATTCAAAAAAGCTAA  
 TTGAATCAAATGAAAGTCAAACACATTGAAACAAAGTTAGCTGAATCAAATGAAAGTCAAATGCTTTCAACAAAGC  
 TAATTGAATCAAATGAAAGTCAAATGCATTCAAAAAAGCTAATTGAATCAAATGAAAGTCAAACACATTGAAACAA  
 AGTTAGCTGAATCAAATGAAAGTCAAATGCTTTCAACAAATCTAATTAAATCAAAGAAAGTCAAATTCCTCAAC  
 AAAGCTAATTGAATCAAATGAAAGTCAAACCTCATTCAACAAAGCTAATTGAATAAAAAAAGTCAATCACATTA  
 AAACAAAGCCGATTAAATCGAATGAAAGTCAAATGCTCTCAACAGAGCTGATAGAATGAAATGAAAGTCAAATGC  
 CTTGAAACAAAGGTAGTTGAATAAAAATATATGTAAAATGATTTTAAACAAAGCTATATAATCAAATGAAAGTCAA  
 ACGCATTAAAAATCCTAATGGAATCAAATGAATGTCATACACATTGAAACATAGTTTATTGAATCAAATGAACT  
 CAAATGCTTTCAACGAAGCTAATTAAACATAGAAAACCCAAATACATTGAAATATAGTTAATTCAATCAAATGAC  
 AGTCAAATGATTTACACAATCGTAATTGAATCAAATGAAAGTCAAATCTTTTGACAAACGTAATTGAATCAAATGA  
 AAGTCAAACACATTGAAACAAAGTAAATTGAATCAAATGAAAGTCAAATGTTTTCAACAAAGCTAATTGAATCAAA  
 TGAAAGTCAAACGCATTTAACAAAGCTAATTGAATCATATGAAAGTCAAATTCATTCAACAAAGCTAATTGAATCA  
 AATGAAAGTCAAACGCATTTAACAAAGCTAATTGAATCATATGAAAGTCAAATTCATTCAACAAAGCAAATTGAAT  
 CAAATGAAAGACAAAAACACACTGAAATAAAGTTAACTGAATCAAATGAAAGTCAAATGATTTCAACAAAGCTAA  
 TCAAATAAATTGAAAGTCAAATGCATTAAACAAAGCTGATTGAATCAAATGAAATTCAAACACATTGAAACAAAGT  
 TAATTGAATCAATTGAAAGTCAAATGCATTGACAAATCTAATTAAATCATATGAAGGTCAAACACGTTGAAACAA  
 AGTTCATTGAATCAAACGAAACTCAAATGCTTTCAACAAAGCTATTTTAATCAAATGAAAGTCAAACACAATGAT  
 ATAAAGTTAATTAAATCAAATGAAAGTCAAATGACTTCAACAAAGGCTAATTGAATCAATTGAAAGTCAAATGCAT

TCAACAATGCTAATTGAGTCAAATGAACTTAAATACATTGAAACAAAGTTAATTGAATCAAATGAAAGTCAACAG  
 ATTTCAACAAAGCTAATTAAATCAATTGAAAGTCAAATGCATTCAAAAAAGCTAATTGAACCTAAGAAAGTCAAAT  
 GCATTCAAAAAAGGTAATTGAATTAAATGAAAGTCAAACACATTGAAACAAAGTTAATTGAATCAAATGAAATTAA  
 AATTCTTTCAACAAAGCTAATTGAATGAAATGAAAGTCAAATGCACTCAACAAAGCAAATTGAATAAAATGAAAT  
 CAAAAGCATTGAAGCAAAGTTAATTGAATCAAGCATAAGTAAACACATTAAAAACAAAGTTAATTGAATCAAATG  
 AAAGTCAAATGATTTTAAAAAGCTAATTGAATCCAATGACAGTCAAACACCTTGAAACAGAGTTAATTGAATCAA  
 ATAAATCTCAAATGCTTTCAACAAAGCTAATTGAATCAAATGAAAGTCAAATGCATTCAAAAAAGCTAATTGAATC  
 AAATGAAAGTCAAACACATTGAAACAAAGTTAGCTGAATCAAATGAAAGTCAAATGCTTTAAACAAAGCTAATTGA  
 CTCAAATGAAAGTCAAACACACTAAACACGTTAATTGAGTCAATTGAAAGTCAATTGCTTTCAACAAAGCTAA

Table of detected monomers

| Indices    | Period<br>Size | Copy<br>Number | Consensus<br>Size | Percent<br>Matches | Percent<br>Indels | Score | A  | C  | G  | T  | Entropy<br>(0-2) |
|------------|----------------|----------------|-------------------|--------------------|-------------------|-------|----|----|----|----|------------------|
| 46--220    | 40             | 4.4            | 39                | 72                 | 7                 | 136   | 47 | 13 | 13 | 25 | 1.79             |
| 155--324   | 89             | 1.9            | 90                | 85                 | 1                 | 234   | 51 | 12 | 12 | 22 | 1.73             |
| 245--2506  | 39             | 57.3           | 39                | 76                 | 6                 | 1806  | 49 | 14 | 12 | 24 | 1.77             |
| 245--2506  | 118            | 19.1           | 118               | 78                 | 6                 | 1795  | 49 | 14 | 12 | 24 | 1.77             |
| 1311--1369 | 18             | 3.1            | 18                | 68                 | 13                | 55    | 49 | 15 | 10 | 25 | 1.76             |
| 1928--1988 | 19             | 3.2            | 19                | 65                 | 17                | 54    | 52 | 14 | 13 | 19 | 1.74             |
| 238--2506  | 79             | 28.7           | 79                | 76                 | 7                 | 1642  | 49 | 14 | 12 | 24 | 1.77             |

Consensus pattern (39 bp):

ATTGAATCAAATGAAAGTCAAATGCATTCAACAAAGCTA

Consensus pattern (90 bp):

AACAAAGGCTAATTGAATAAAATGAAAGTCAAATGCACTCAACAAAGCAAATTGAATAAAATGAAAATCAAAAAC  
 ATTGAAACACATTGA

Consensus pattern (39 bp):

AACAAAGCTAATTGAATCAAATGAAAGTCAAATGCATT

Consensus pattern (118 bp):

AACAAAGCTAATTGAATCAAATGAAAGTCAAATGCATTCAAAAAAGCTAATTGAATCAAATGAAAGTCAAACACAT  
 TGAAACAAAGTTAATTGAATCAAATGAAAGTCAAATGCTTTC



Consensus pattern (18 bp):

AACAAAGCTAATTGAATC

Consensus pattern (19 bp):

AAAGTCAAATGCATTCAAA

Consensus pattern (79 bp):

ACATTGAAACAAAGCTAATTGAATCAAATGAAAGTCAAATGCTTTAAACAAAGCTAATTGAATCAAATGAAAGTCA  
AAT

BLAST alignments:

Beta corolliflora minisatellite DNA, clone pBC1447 Sequence ID: [AJ288880.1](#)

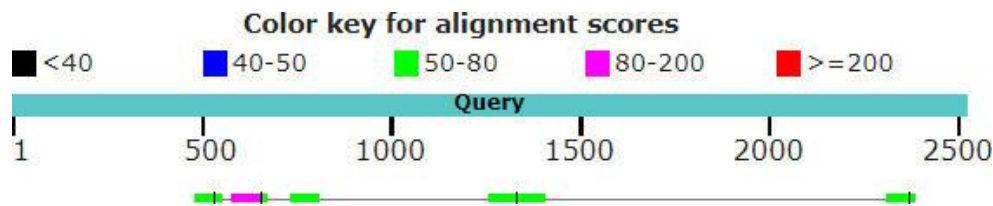

Cluster 112

>CL112Contig18 (2943-182.8-537871)

TCTTTGTTTGAATGTGTTTGACTTTCATTTACATACAATTAGCTTTATAAATGCATTTAACTTTCATTTGATTTAATTTG  
CTTTGTTGAAAGTGTGTTTGACTTTCATTTGATTCATTTAGCTTTGTTAAATGCATTTGACTTTCATTTAAGTGTATTAGA  
TTTATTGAATGCATTTGACTTTTTTTTTTTTATTCAATAAGCTTTGTTGAATGCATTTGACTTTCATTTGATTGAATTTG  
TTTTAATGAATGCATTCTACTTTCATTAAATTCAAATAACTTTATTGAATGCGTTTCACTTTCATTTGATTCAACTAGC  
TTTGTGTTGAATGCATTTGACTTACATTTGATTCAATGACTTTCATTTGATTCAATTCGCGTTGTTTGAATGTATTAGA  
CTTAGCTTTGTTTGAATGTATTTGACTTTTATTTCACTCGATTAGCTTTGTGAATGCATTTGACTTTCATTTGATTCAA  
TTAGCTTTGTTCAATGCATTTGACTGTCATGTGATGCATTTGAGTTTAAATTTGATTCAATTAGCTTTGTCTGAATGT  
GTTTGACTTTCATTTGATTCAACTAGCTTTCATGAATGCGATTAACTTTCATTTGATTCAATTAGCTTTGATTGAATG  
TGTTTGACTTTCATTTGATCCAATTACCTTTGTTTAAATGTGTTTGACTTTCATTAGATTAAATTAGCTTTGATGAATGC  
ATTTGACTTTCATTTGATTTAATTTCTTTGTTGAATGTGTTTGACTTTCATTTGATTCAATAGCTTTGTAAATGCA  
TTTGACTTTCATTTAGGTGAATTAGATTTGTTGAATGCATTTGACTTTCATTAGATTAAATTAGCTTTTTTGAATATAT  
TTGACTTTCACAGGATTCAATTAGCTCTGGTGGAATGCATTTCACTCCATTGGATTCAATAAGCCTTTTTGAAACA  
ATTTGACTTTCATAGGATTCAATTAGCTTTGTTTTATTGTGTTTAACTTGCACTTGATTCAATAAGCATTGTTGAATG  
CATTTGATGTTCAATTAATTCAATTAGCTTTGTTCAATACATCTCACTTTCTTTTGATTCAATTAGCTTTGTTATGAATT

TGTGTTTCATTTGATTCAATTATCTTTGTTGCAATGTTTTGACTTTCTTTAGATTAAATCAGCTTTGTTGAATGCATT  
 TTGACTTTTCATTTGATTCAATTAGCTTTATTGAATGCAATTGACCAATATTTGATTCAATTAACATACATTTTGATTCA  
 ATAAGCTTTGTTTGAATGTGGTTCACTTTCAAGTTAAGAGAATTATATTTGTTGAATGCATTTGGCATTTTTTGATTCA  
 ATTAGCTTTGTTGAATGCATTTGACTTTTCATTTGATTAAATTTGCTTTGTTTGAATGTGTTTGACTGTGATTTGATTCA  
 ATTAGCTTTGTTGAGTGCATTTCACTTTTCATTTGATTGAGTTAGCTTTGTTTGAATGTGTTTGACTTTTATTTGATTCA  
 ATTACCTTTGTTTGAATGTGTTAACTATCATTAGATTAAATTAGCTTTATTGAATGCATTTGTCTTTTCATTTGATTAA  
 ATTATATTTGTTGAATGCATTTGACTTTTATTTGATACAATTAGCTTTGTTTGAATGTATTTGACTTTTCATTTGATTCA  
 ATAAGCATTGTTGAATGCATTTGATGTTTCATTTGATTCAATTAGGTTTGTTCATGAATTTGATTTTCATTTGATTCA  
 ATAAGCATTATTGAATGCATTTGATTCAATAAGCTTTGCTCAATGCATTTGGCTTTCACTTGATTCAATTAGCTTTGT  
 TATGCATTTGAGTTTCATTTGATTCAATTATCTTTGTTGCAATGTGCTTGACTTTAATTTTATTCAATTAGCATTTTTT  
 GAATGTGTTTGACTTTTCATTTAAGAGAATTAATTTGTTGCATGCATTTGACTTTTTTTTTTATTCAATTAGCTTTGTTG  
 AATGCATTTTACTTTTCATTTGATCAAATTAGCTTTGTTGAATGTATCTGACTTTTCTTTAATTCAATTAGCTGTGTTGA  
 GTGTATTTCACTTCATTTGATTCAATTAGCTTTGTTGGAATGCGTTTGACTCTCATTTAATTCAATTAGCTTTATTGA  
 ATGCATTTGACTTTTATTTGATTCAATTAAGTTAGTTTGAATGTGTTTCACTTTTCATTTAATTTAATTATCTTTGTTTGA  
 ATGTGTTTGACTTTTCATTTCATACAATTAGCTTTATAAATGCATTTAACTTTTCATTTGATTAAATTTGCTTTGTTGAAT  
 GTGTTTGACTTTTCATTTGATTCAATTAGCTTTGTTAAATGCATTTGACTTTTCATTTAAGTGTATTAGATTTATTGAATG  
 CATTTGACTTTTTTTTTTTTATTCAATAAGCTTTGTTGAATGCATTTGACTTTTCATTTGATTGAATTTGTTTTAATGAAT  
 GCATTCTACTTTTCATTAAATTCAATTAAGTTTATTGAATGCGTTTCACTTTTCATTTGATTCAACTAGCTTTGTTTGAAT  
 GCATTTGACTTACATTTGATTCAATGACTTTTCATTTGATTCAATTCGCTTTGTTTGAATGTATTAGACTTTTCATTTGAT  
 TAAATTAGCTTTGTTTGAATGTATTGACTTTTATTTCACTCGATTAGCTTTGTGAATGCATTTGACTTTTCATTTGATT  
 CAATTAGCTTTGTTCAATGCATTTGACTGTCATGTGATGCATTTGAGTTTTAATTTGATTCAATTAGCTTTGTCTGAA  
 TGTGTTTGACTTTTCATTTGATTCAACTAGCTTTTCATGAATGCGATTAACTTTTCATTTGATTGAGTTAGCTTCGATTGA  
 ATGTGTTTGACTTTTCATTTGATTCAACTAGCTTTTATGTAATGCGATTAACTTTTCATTTGATTCAATTAGCTTTGATTG  
 ATTGTGATTGACTTTTCATTTGATGTAT

Table of detected monomers

| Indices  | Period<br>Size | Copy<br>Number | Consensus<br>Size | Percent<br>Matches | Percent<br>Indels | Score | A  | C  | G  | T  | Entropy<br>(0-2) |
|----------|----------------|----------------|-------------------|--------------------|-------------------|-------|----|----|----|----|------------------|
| 17--2544 | 39             | 63.5           | 39                | 70                 | 12                | 480   | 24 | 11 | 14 | 49 | 1.77             |
| 49--351  | 120            | 2.6            | 116               | 77                 | 9                 | 297   | 25 | 11 | 12 | 49 | 1.75             |
| 334--372 | 19             | 2.1            | 19                | 95                 | 0                 | 69    | 28 | 15 | 10 | 46 | 1.78             |

|            |     |      |     |    |    |      |    |    |    |    |      |
|------------|-----|------|-----|----|----|------|----|----|----|----|------|
| 559--621   | 20  | 3.2  | 20  | 71 | 13 | 67   | 25 | 17 | 11 | 46 | 1.81 |
| 524--1734  | 39  | 30.3 | 39  | 74 | 9  | 604  | 24 | 11 | 15 | 48 | 1.78 |
| 524--1243  | 79  | 9.2  | 78  | 78 | 5  | 603  | 25 | 12 | 14 | 47 | 1.79 |
| 524--2548  | 118 | 17.1 | 117 | 76 | 8  | 1517 | 24 | 11 | 14 | 49 | 1.77 |
| 1306--1361 | 19  | 2.9  | 20  | 71 | 7  | 62   | 21 | 8  | 19 | 50 | 1.75 |
| 1330--1756 | 79  | 5.4  | 79  | 84 | 1  | 509  | 24 | 9  | 15 | 50 | 1.74 |
| 1644--1838 | 106 | 1.9  | 104 | 86 | 4  | 284  | 26 | 12 | 15 | 45 | 1.81 |
| 1722--1783 | 28  | 2.2  | 28  | 88 | 0  | 88   | 30 | 14 | 14 | 40 | 1.86 |
| 1753--1847 | 37  | 2.5  | 37  | 86 | 6  | 111  | 22 | 14 | 14 | 48 | 1.80 |
| 1750--2548 | 39  | 20.3 | 39  | 77 | 4  | 701  | 24 | 12 | 13 | 49 | 1.76 |
| 2529--2567 | 19  | 2.1  | 19  | 95 | 0  | 69   | 28 | 15 | 10 | 46 | 1.78 |
| 2491--2603 | 59  | 1.9  | 59  | 90 | 0  | 181  | 23 | 14 | 13 | 48 | 1.79 |
| 2548--2719 | 40  | 4.4  | 40  | 85 | 2  | 215  | 22 | 12 | 15 | 48 | 1.79 |
| 2734--2939 | 40  | 5.2  | 39  | 80 | 5  | 243  | 23 | 13 | 16 | 47 | 1.81 |
| 2734--2939 | 80  | 2.6  | 80  | 92 | 2  | 344  | 23 | 13 | 16 | 47 | 1.81 |
| 2768--2939 | 20  | 8.6  | 20  | 64 | 12 | 68   | 24 | 13 | 15 | 46 | 1.82 |

Consensus pattern (39 bp):

TTTGACTTTCATTTGATTTAATTTGCTTTGTTAAATGCA

Consensus pattern (116 bp):

AATGCATTTCACTTTCATTTGATTCAACTAGCTTTGTTGAATGCATTTGACTTTCATTTGATTCATTTGCTTTAATAAA  
TGCATTCTACTTTCATTAAAGTCAAATAACTTTATTG

Consensus pattern (19 bp):

TGACTTACATTTGATTCAA

Consensus pattern (20 bp):

CTTTCATTTGATTCAATTAG

Consensus pattern (39 bp):

ATTTGATTCAATTAGCTTTGATGAATGTGTTTGACTTTC

Consensus pattern (78 bp):

ATTTGATTCAATTAGCTTTGTTGAATGTATTTGACTTTCATTTGATTCAATTAGCTTTGTTGAATGTATTTGACTTTC

Consensus pattern (117 bp):

ATTGATTCAATTAGCTTTGTTGAATGTGTTTGACTTTCATTTGATTCAATTAGCTTTGATGAATGCATTTGACTTTC  
TTTGATTCAATTAGCTTTGTTGAATGTATTTGACTTTC

Consensus pattern (20 bp):

ATTGTGGAATGCATTTGGC

Consensus pattern (79 bp):

TTTGATTCAATTAGCTTTGTTGAATGCATTTGACTTTCATTTGATTCAATTAGCTTTGTTGAATGTATTTGACTTTC

Consensus pattern (104 bp):

CATTTGATTCAATAAGCATTGCTCAATGCATTTGGATTTCACTTGATTCAATTAGCTTTGTTATGAATTTGAGTTTCA  
TTTGATTCAATAAGCATTATTGAATG

Consensus pattern (28 bp):

CATTTGATTCAATAAGCATTACTCAATG

Consensus pattern (37 bp):

TTGATTCAATAAGCTTTGTAATGCATTTGAGTTTCAC

Consensus pattern (39 bp):

CATTTGATTCAATTAGCTTTGTTGAATGCATTTGACTTT

Consensus pattern (19 bp):

TGACTTACATTTGATTCAA

Consensus pattern (59 bp):

ACTTTCATTTGATTCAACTAGCTTTGTTTGAATGCATTAGACTTACATTTGATTCAATG

Consensus pattern (40 bp):

TGACTTTCATTTGATTCAATTAGCTTTGTTTGAATGTATT

Consensus pattern (39 bp):

ATTGATTCAATTAGCTTTGTTGAATGTGATTGACTTTC

Consensus pattern (80 bp):

ATTGATTCAATTAGCTTTGATTGAATGTGTTTGACTTTCATTTGATTCAACTAGCTTTCATGTA  
ATGCGATTAACCTTC

Consensus pattern (20 bp):

ACTTTCATTTGATTCAATTA

BLAST alignments:

Chenopodium quinoa clone 12-13p repeat region sequence. Sequence ID: [HM641822.1](#)

Beta corolliflora minisatellite DNA, clone pBC1447 Sequence ID: [AJ288880.1](#)

>CL134Contig5 (2403-184.0-442166)

AAATTAAAAAAAAGTCAATGCATTGAGCAAAAAGCTAATTGAATCAGATGAAAAGTCAAACACAAACAAATCTA  
ATGGAATCAAACGAAAGTCAAACACATTCTAACAAAGCTAATTGAATCAAATGAAAGTCAAATGCAATCAGCAAAA  
GCTAATTGAATCAAAAGAAAGTCAATTGCTTTCTATAAAGCTAATTGAACCAAATGAAAGTCAAATGCTTCCAACA  
AAGCCAATTGAATCAAATGAAAGTAAAATGCATTCAACAAAGCTAAGTTCATCACATGAAACCCAAACGCATTTTA  
CAAAGCTAAATGAATTAATAAAAAGTCAATGCATTGAGCAAAAGCTAATTGAATCAAATGAAAGTCAAACACATTC  
TAACAAAGCTAATTGAATCAAATGAAAGTCAAAGACATTAACAATGCTAATTGAATCAATTAATAATTTAACTTC  
ATTCATCATGGCTAATTCCTCAAATTTGACTCAAATGCAATTTACAAAGCTAAACAAATGAAATGAAAGTAAAAC  
ACATCCATACAAAGCTAATTAAATGAAATGAAAGTTAAAAGCATTTAATCAGGCAAATTGAATCAAACCAATGTCA  
AATGCATTTAAAAAAGCTAATTAAATCAAATGAAAGTCAAACACGTTCAAAAAAAGATAATTAAATCAAATGAAA  
CTCAAATGCATGTTACAAAGGTAAACGAATCGAATGAAAGTCAAACAAAGCTAATTGAATCAAATGAAAGTTAAA  
TGCATTCAACAAGGCTACATCACTCAAATGAAAGTCAAATGCAATTTAGAAATCTAAATGAATGAAATGAAATTCA  
AACACATTCAAACAAAGCTAGCTAAATGAAATGAAAGATTCAACAAAGCAAATTGAATCAAACCAAAGTCAAATTC  
ATTCAAAAAAGCTAATTAAATCAAATGAAAGCCAAACACATTCAAAAAAGCTAATTGAATCAAATGAAAGTCAAA  
TACATTCAACAACGCTAAATTAATTGAATGAAATTCAAATACATTAAGGTAAGCTACTTAAATCAATTAAGTCA  
ACTGCATTCAAAAAAGCAAATCGAATCAAATGGAAGTCAAATGCATTCAACAAAGCTAATTAAAGCAAAAGAAAG  
TCAAACACATTCAGAAGAAAAATCTAATTCATCAAATGAAAGTCAAATGCATTTTCATAGCTAATTGAGCTGAAT  
GAAAGTCAAACACATTCAAACAAAGCTAATTGAATCAAATGAAAGTCAAATGCATTCAACAAGGGTAATTCAATCG  
AATGAACGTCAAATGCAATTCATAAAGCCAAATGAATCAAATAAAAGTCAAACACATTCAAACAAAGTGAAATGA  
AAGTCAAATACATTCTACAAAAAAACCGAATCGATTGAAGTCAATTGCATTGAGCAAAAGCTAACTGAATCAGACGA  
AAGCCAATCACATTCAAACAAAGCCAATTTAATCAAATAAAAGTCAAATGCAATTAACAAAGCCAATTGAATCAAA  
TAAAAGTCAAATGCTTTCAGAAATGTATACTAAAATCAAATGAAAGTGAAGAGCATTCAACAAAGCGAATTGAATC  
AAATGAAAGTCTAACACATTAAATCAAAGCAAATTAAGTAAAATGAAAGTCAAATGCATTCAAACAAAGCTAATTG

AATCAAATGAAAGCCAAATGCAATCAGCAAAGCTAATTGAATCAAAAGAAAGTCAATTGCTTTCTATAAAGCTAAT  
TGAACCAAATGAAAGTCAAATGCTTCCAACAAAGCCAATTGAATCAAATGAAAGTAAAATGCATTCAACAAAGCTA  
AGTTCATCACATGAAACCCAAACGCATTTTACAAAGCTAAATGAATTAAATAAAAGTCAATGCATTGAGCAAAGC  
TAATTGAGTCAGATGAAAGTCAAACACATTCAAACAAATCTAATTGAATCAAACGAAAGTCAAACACATTCTAACA  
AAGCTAATTGAATCAAATGAAAGTCAAAGACATTAACAATGCTAATTGAATCAATTAATTAATTAATTAATTAATTAAT  
CATGGCTAATTCACTCAAATTTGACTCAAATGCAATTTACAAAGCTAAACAAATGAAATGAAAGTAAAACACATCC  
ATACAAAGCTAATTAATGAAATGAAAGTTAAAGCATTTAATCAGGCAAATTGAATCAAACCAATGTCAAATGCA  
TTAAATCAAAGCAAATTAAGTAAATGAAAGTCAAATGCATTCAAACAAAGCTAATTGAATCAAATGAAAGCCAAA  
TGCAATCAGCAAAGCTAATTGAATCAAAAAAAAAAGTCAATTGCTTTTTATAAAGCTAATTGAACCAAATGAAAGTC  
AAATGCTTCCAACAAAGCCAATTGAATCAAATGAAAGTAAATGCATTCA

| Indices   | Period<br>Size | Copy<br>Number | Consensus<br>Size | Percent<br>Matches | Percent<br>Indels | Score | A  | C  | G  | T  | Entropy<br>(0-2) |
|-----------|----------------|----------------|-------------------|--------------------|-------------------|-------|----|----|----|----|------------------|
| 13--2403  | 39             | 61.4           | 39                | 72                 | 8                 | 1484  | 49 | 16 | 12 | 22 | 1.78             |
| 13--2401  | 117            | 20.5           | 117               | 72                 | 9                 | 1136  | 49 | 16 | 12 | 22 | 1.78             |
| 13--2391  | 79             | 30.6           | 77                | 71                 | 9                 | 1234  | 49 | 16 | 12 | 22 | 1.78             |
| 697--753  | 30             | 1.9            | 30                | 85                 | 0                 | 78    | 52 | 12 | 17 | 17 | 1.74             |
| 877--916  | 21             | 2.0            | 20                | 85                 | 5                 | 53    | 52 | 20 | 7  | 20 | 1.70             |
| 583--1024 | 149            | 3.0            | 148               | 74                 | 9                 | 448   | 51 | 14 | 11 | 22 | 1.74             |

Consensus pattern (39 bp):

AAAGTCAAATGCATTCAACAAAGCTAATTGAATCAAATG

Consensus pattern (117 bp):

AAAGTCAAATGCATTCAACAAAGCTAATTGAATCAAATGAAAGTCAAACGCATTTTACAAAGCTAATTGAATCAAA  
TGAAAGTCAAATGCATTCCAACAAAGCTAATTGAATCAAAT

Consensus pattern (77 bp):

AAAGTCAATGCATTCAACAAAGCTAATTGAATCAAATGAAAGTCAAACACATTCAACAAAGCTAATTGAATCAAAT  
G

Consensus pattern (30 bp):

ACAAAGCTAAACGAATCAAATGAAAGTCAA

Consensus pattern (20 bp):

CAAAGCAAATTCAATCAAAC

Consensus pattern (148 bp):

GCAAATTGAATCAAACCAAAGTCAAATGCATTCAAAAAAGCTAATTAAATCAAATGAAAGTCAAACACATTCAAAA  
AAAGCTAATTGAATCAAATGAAACTCAAATACATTCAACAAAGCTAAACTAATTGAATGAAAGTCAAACAAA

BLAST alignments:

Chenopodium quinoa clone 12-13p repeat region sequence. Sequence ID: [HM641822.1](#)

Beta corolliflora minisatellite DNA, clone pBC1447 Sequence ID: [AJ288880.1](#)

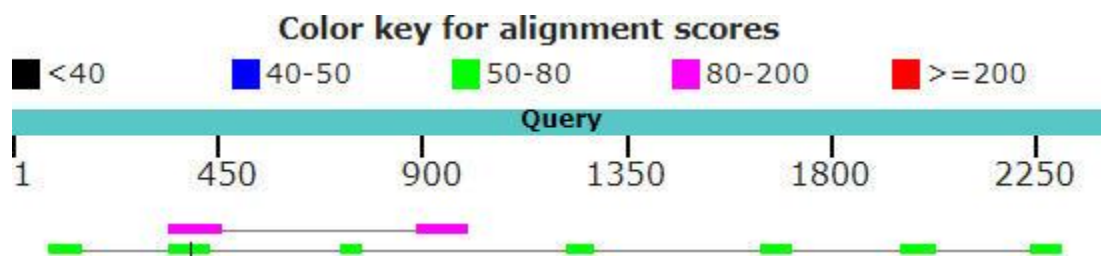

CLUSTER 144

>CL144Contig8 (2170-136.3-295855)

AAAAAAGCTACTTGAATCAAATGATAGTCTAATGAATTCAAACAAGCTATTTGAATCAATTTAAAGTGAAATGCAT  
AAAAAAAAAAAAAGCTAATTGAATCAAAAAAGAAAGTCAAACACATTCAAACAAAGCTAATTGAATCAAATGAAAA  
TAAACACGTTCAAACAAAGCTAATTGAATCGAATGAAAGTCAAATGCATTCAAACAAAGCTAATTGAATCAAATG  
AAAGTCAAACCCATTCAAACAAAGCTAATTATATCAAATGAAAGTTAAAGACATTCAAACAAATCTAATTAAATCA  
AAAGAATGTCAATTGCATTCAACAAAGCTAGTTTAATAAAATGAAAGTCAATTGCATTCAACAAACTTAATTAAAT  
GAAATAAAAGTCAAACACATTCAAACAAAGCTAACTGAATGAAATGAATTCAAAAAAGCTAATTGAATCAATTAAA  
AGTCAAATGAATTTAAACAAAGCTAATTCAATGAAATGAAAGTCAAACACATTCAAATAAAGCTAATTGAACCAAA  
TGAAACTCAAACACATTCAAACAAAGCTAATTGAACCAAATGAAAGTCAAATGAATTCAAAAGCTAATTGAATCGT  
TTAAAGTCAAATGCTTTACCAGAGCTAGTTGAATCAAAAAAGAAAGTCAAACACTTTCAAACACAGCCAATTGA  
AACAAATGAGACTCAAATGAATTCAACAAAGCCAATTGAATCAAATGAAATTCAAATGCTTTCAACAAAGCTAATC  
AATCAATTGATAGTCAAATGCATTTAAACAAAGCTAATCGAAAGTCAAACACATTCAAACAGAGCTAGTTAAATC  
AAAACAATGTCAATTGCATTCCACAAAGCTAATTGAATCAAATGAATTCAAAAAAGCTAATTAAATCAATTAAAAG  
TCAAATGCATTCAAAAAAGCTAATTGAATCAAATGAAAGTCAAACACATTCAAACAAAGCTAATTGAATCAAATA  
AAAGTCAAACACAACCTAACAAAGCTAATTGAATCAAATAAAGTGAAATGCATTGAGAGAAGCTATTTGAATAGT  
TTGAAAGTCAAATGCATTCAAAGAAAGCTAATTGAATCAAATGGAAACAATCACATCCAAACAAAGCTAATTGAAT

CAAATGAAAGTCAAATGCATTCAAAAAAGCCGTTTGAATCAATTAAGTCAAATGCATTGAAAAACCTATTTGG  
 ATCAACTGAGAGTCAAATGCATTCAAACGAGACTAATTGAATCAAACGAAAGTCAAACACATTCAAACAAAGCTAC  
 TTGAATCAAATGAAAGTCAAATGAATCCAAAAAGCTAATTGAATAAATTGAAAGTCAAATGCGTTCAAGCAAAG  
 CTAGTTCTCAAAGAAAGTCAAACACATTAAAGCAAAGCTAATTGAATCAAATGAAATCAAACACATTCAAACA  
 AAGCTAATTGAATCAAATGAAAGTCAAATGCATTCAAAAAGCTATTTGAATCAATTGAAAGTCAAATGCTTTCAA  
 AAAGCTATTTGGATCAATTGAAAGTCAAACACACTCAAACAAAGCTAAAGAATAGAATACATGTCAAACGCATTCA  
 AAAAAAGCTATTTGAATCAATTGAAAGTCAAATGCATTCAATAAAGCTATTTGGATCAATTAAGTCAAATGCAT  
 TCAAACGAGACTAATTGAATCGAATGAAAGTCAAACACATTCAAAAAAGCTACTTGAATCAAATGATAGTCTAAT  
 GAATTCAAACAAGCTATTTGAATCAATTAAGTGAATGCATAAAAAAAGCTAATTGAATCAAAAAAGAA  
 AGTCAAACACATTCAAACAAAGCTAATTGAATCAAATGAAATAAACACGTTCAAACAAAGCTAATTGAATCGAA  
 TGAAAGTCAAATGCATTCAAACAAAGCTAATTGAATCAAATGAAATAAACACGTTCAAACAAAGCTAATTGAAT  
 CGAATGGAAGGCAAATGCATTCAAACAAAGCTAATTGAATCAAATGAAAGTCAAACCCATTCAAACAAAGCTAATT  
 ATATCAAATGAAAGTTAAAGACATTCAAACAAATCTAATTAAATCAAAGAATGTCAATTGCATTCAACAAAGATA  
 AATGAATCAAATTAATTCAAACACATCCAAACAAAGCTAGTAGA

| Indices    | Period<br>Size | Copy<br>Number | Consensus<br>Size | Percent<br>Matches | Percent<br>Indels | Score | A  | C  | G  | T  | Entropy<br>(0-2) |
|------------|----------------|----------------|-------------------|--------------------|-------------------|-------|----|----|----|----|------------------|
| 86--2165   | 40             | 53.2           | 40                | 76                 | 8                 | 1586  | 50 | 15 | 11 | 22 | 1.77             |
| 1293--1353 | 20             | 3.1            | 20                | 70                 | 25                | 58    | 52 | 9  | 14 | 22 | 1.71             |
| 1611--1674 | 19             | 3.2            | 20                | 66                 | 20                | 53    | 43 | 14 | 12 | 29 | 1.81             |

Consensus pattern (40 bp):

AAAGCTAATTGAATCAAATGAAAGTCAAACACATTCAAAC

Consensus pattern (20 bp):

TGAATCAAATGAAAGTCAAA

Consensus pattern (20 bp):

TCAATTAAAGTCAAATGCAT

BLAST alignments:

Chenopodium quinoa clone 12-13p repeat region sequence. Sequence ID: [HM641822.1](#)

Beta corolliflora minisatellite DNA, clone pBC1447 Sequence ID: [AJ288880.1](#)



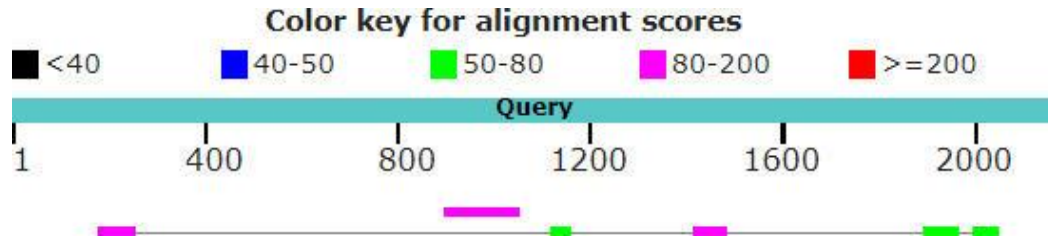

## CLUSTER 145

&gt;CL145Contig8 (3578-52.4-187313)

TCAAATGAAAGCCATACACATTTTAAAAAGCTAATTGAATCAAATGAAATTCAAAAACATTACCGATAAAGCTAA  
 TTGAAAAAATGAAATTCAAATGCATTCAACAAATCTAATTTAATCAAATGAAATTCAAACACATTCAACAAAGCTA  
 ATTGAATCAAATGAGAGTCAAATGCATTCAACAAAGCTAATTGAATTAATGAAAGTCAAATGCATTTAACATTGC  
 TAAATGAGTCAAATGCAAGACAAATGCTTTTAGCAAAGCTAATTGAATCAAATGAAAGTCAAAAACATTCTAGCAA  
 AGCTAATTGAGTCAACTAAAAGTCAAACACATTCAAACAACGCTAATCAAATCAAATGAAACTCAAATGCATTCAA  
 CAATGCTAATTAATCAAATGAAAGTCAAACACATTCTAACAAAGCTAATTGAATCAAATGAAAGTCAAATGCATT  
 CAACAAAGCTAATTTATTCAAATGAAAGTCAAATGCGTTCAATAATGTTAATTGAATCTAATGCAAGTCAAATGTAT  
 ACAATAAGCTAATTAATCAAAAAGAGAGTCAAATGCATTCAACAAAGCTAATTGAATAAAATGAAAGTCAAATG  
 CATTCAACAATGCTAATTGAATCATTGCAAGTCAAACAACTAATTGAATCAAACGAAAGTCAAATGCATTCACTA  
 ATGCTAATTGAATCAAATAAAATTCAAATGTTTAGCTAATTGAGTCAAAAAGAAAGTCAAATGCATTCAAACAAATC  
 TAATAAAGCAAATGAAAGTCAAATGCATTTAACAAATCTAATTGAATCAAATGAAAATCAAATTTATTCAATGAA  
 GGTAATTAAGAAATTAATTCAAACACATTCTAACAAAGCTAGTTGAATCAAATGCGAATCAAATGTGTTCAAA  
 CAAAGCTAATTGAATCAAACGAAATTCGAACACATTCAACAAAGCTAATTGAATCAAATGCAAATCAAATGTATTC  
 AAACAAAGCTAATTGAATCAAATGAAATTCAAACACATTCAACAAAGCTAATTGTATCCAACGAAATTCAAACATA  
 ATCAACAAAGCTAATTGAATCAAATGAAAATCAAATGCATGCAACAAATTTAATTGAATAAAATGAAAGTCAAATG  
 TATTCAATAATGTTAATTGAATCAAATGCAAGTCAAATGCATTTGACAAGCTAATTGAGTCAAATGAAAGTCAAAA  
 ACATTCTAAAAGGCTAATTAATCAAACGAACTCAAACACATTCTACAAAGCTAATTGAGTCAAATGAAAGTCT  
 AACACATTTAAACAAAGCTAATTGAATCAAGTCAAATGCAATGCATTGATAAAGCTAATTGAAAAAATGAAAT  
 TCAAATGCATTCAACAAATCTAATTTAATCAAATGAAATTCAAATACATTCTAACAAAGCTAGTTGAGTCAAATAAA  
 AGTCAAATACATTCTAACAAAGCTAGTTGAGTCAAATAAAGTCAAACACATTAATCAACAAAGCTAATTAATCA  
 TATGAAACTCAAATGCGTTCAATAAAGCTAATTAATTAATGAAAGTCAAAAACATTCTAGCAAGGCTAATTAAG  
 TCAACTAAAAGTCAAACACATTCAAACACATTCAAACATTGCTAATCAAATCAAATGAAACTCAAATGCATTCAACA  
 AAGCTAATTAATCAAATGAAAGTCAAACACATTCTAACAAAGCTAATTGAATCCAATAAAGTCAAATGCATTCA  
 GTAAAGCTAACTGAATCAAATGAAAGTCAATTGCATTAACAAAGCAAGTTGAATGAAATGAAAGTCCAATGCA

TTCAATAAAGATAATTGAGTTAAATGAAAGTAAACACATTCAGACAAAGCTAGTTGAATCAAATGAAAGTCTAAT  
 GCATTCAATAAAGCTAAGTGAATCAAATGAAAGTCAATCACATTAATACAAAGCTAATTAACAAGTGAAGTCA  
 AAAGCATTTAAAAAAGCTAATTGAAATAAATTAATGTAAATGTATTCAACCAAAGCTAATTGAATCAAATGAAAG  
 TCAAACACATTCTAATAAAGCTAATTGAATCAAATGAAACTCAAATGCATTCAACAAAGCTAATTGAATCAAATGA  
 AAGTCAAATGCATTCAACTAAGCTAATTGAATCAAATGAAAGTCTAATGCATTCAATAAAGCTAAGTGAATCAAAT  
 GAAAGTCAATCATATTAATACAAAGCTAATTGAATGAAATGAAAGTCAAATGCTTTCAACAAAGCTAATTGAATCA  
 AATGAAAGTCAAACACATTCTCACAAGCTAATTGAATCCAATAAAGTCAAATACATTCAGTAAAGCTAACTGAA  
 TCAAATGAAAGTCAATCGCATTAAAAACAAAGCTAGTTGAATGAAATGAAAGTCCAATGCATTCAAGAAAGATAATT  
 GAATCAAATGAAAGTAAACACATTCAAACAAAGCTAGTTGAATCAAATGAAAGTCCAATGCATTGATAAAGCTA  
 ATTGAATAAAATTCAAGTGAATTTCAATTCGACAAGCTAATTGAACCAACTGAAAGTCAAACACATTCTAACAAAA  
 CAAATCAATCAAATGATACTCAAATTCATTTAACTAAGCAACTTGAATCAAATGAAAGTCAAATGCATTCAAATAAG  
 CTAATTGAATCAAATGAACTAAAATGCATTTGACAAACAAAATTGAATCAAATTAAGTCAAATACATTCAAACA  
 AAGCTATTTGAATCTACTGAAACTCAAATAAATTCAACAAAGCTAATTGAAACAAATGAAAGTCAAAACATATTC  
 ACACAAAGCTAATTGAATTAATGAAACTCAAATGCATTCAACAAATCTAATTGAATCAAATGAAAGTCAAATGCA  
 TTCAACTAAGCTAATTGAAAGAAAAGAAAGTCTAATGCATTCAACAAAGCTAATTAAATCAAATGCAAGTCAAATG  
 CATTCAAAAAGCTAATTGAATCCAATGAAAGTCAAATCATTCTTAAAAAGCTAATTGAATCAAATGAAACTGAA  
 GCACATTCTAACAAAGTTGATTGAGTCCAATGAAAATCAAACACATTCAAACAAAGCTAATTGAATCAACTAAAC  
 TCAAATGCATTTAACTAAGCAAATTGAATCAAATGAAAGTCAAATGCATTCAACTAAGCTATTTGAATCAAATGAA  
 AGTCTAATGCATTCAATAAAGCTAAGTGAATCAAATGAAAGTCAATCACATTAATACAAAGCTAATTAACAAGT  
 GAAAGTCAAAAGCATTTAAAAAAGCTAATTGAAATAAATTAATGTAAATGTATTCAACCAAAGCTAATTGAATCA  
 AATGAAAGTCAAACACATTTAATAAAGCTAATTGAATCAAATGGAAGTCAAATGCATTCAACAAAGCTAATTGAA  
 ATCTAATGAAAGTCAAATGCATTCAACTATGCTAATTGAAAGAAAAAAAGTCTAATGCATTCAACAAAGCTAATT  
 AAATCAAATGCAAGTCAAATGCATTCAAAAAGTTAATTGAATCCAATGAAAGCAAACACATTCTTAAAAAGCTAA  
 TT

Table of detected monomers

| Indices  | Period<br>Size | Copy<br>Number | Consensus<br>Size | Percent<br>Matches | Percent<br>Indels | Score | A  | C  | G  | T  | Entropy<br>(0-2) |
|----------|----------------|----------------|-------------------|--------------------|-------------------|-------|----|----|----|----|------------------|
| 28--3557 | 39             | 89.7           | 39                | 78                 | 5                 | 3103  | 48 | 15 | 11 | 24 | 1.77             |
| 1--3578  | 79             | 45.5           | 78                | 77                 | 7                 | 2752  | 48 | 15 | 11 | 24 | 1.77             |
| 436--499 | 21             | 3.2            | 21                | 67                 | 13                | 62    | 45 | 15 | 12 | 26 | 1.82             |

|            |     |      |     |     |    |     |    |    |    |    |      |
|------------|-----|------|-----|-----|----|-----|----|----|----|----|------|
| 572--754   | 68  | 2.7  | 67  | 82  | 7  | 199 | 46 | 14 | 12 | 26 | 1.80 |
| 1611--1637 | 10  | 2.7  | 10  | 100 | 0  | 54  | 51 | 29 | 0  | 18 | 1.46 |
| 1511--3031 | 118 | 12.7 | 129 | 72  | 13 | 434 | 48 | 15 | 11 | 24 | 1.77 |
| 1550--1716 | 89  | 1.9  | 90  | 84  | 1  | 228 | 49 | 18 | 8  | 23 | 1.74 |

Consensus pattern (39 bp):

AAAGCTAATTGAATCAAATGAAAGTCAAATGCATTCAAC

Consensus pattern (78 bp):

TCAAATGAAAGTCAAATACATTCAACAAAGCTAATTGAATCAAATGAAAGTCAAATGCATTCAACAAAGCTAATTG  
AA

Consensus pattern (21 bp):

TCAAATGAAAGTCAAATGCAT

Consensus pattern (67 bp):

ATTCAAACAACTAATTGAATCAAAAGAAAGTCAAATGCATTACAATGCTAATTGAATCAAATAAA

Consensus pattern (10 bp):

TCAAACACAT

Consensus pattern (129 bp):

GCTAATCAAATCAAATGAAACTCAAATGCATTCAACAAAGCTAATTAAATCAAATGAAAGTCAAAAACATTCTAAC  
AAAGCTAATTGAATCCAATAAAAGTCAAACACATTCAAACACATTCAAACATT

Consensus pattern (90 bp):

GCTAATCAAATCAAATGAAACTCAAAAACATTCTAACAAAGCTAATTAAATCAAATAAAAGTCAA  
ACACATTCAAACACATTCAAACATT

BLAST alignments:

Chenopodium quinoa clone 12-13p repeat region sequence. Sequence ID: [HM641822.1](#)

Beta corolliflora minisatellite DNA, clone pBC1447 Sequence ID: [AJ288880.1](#)

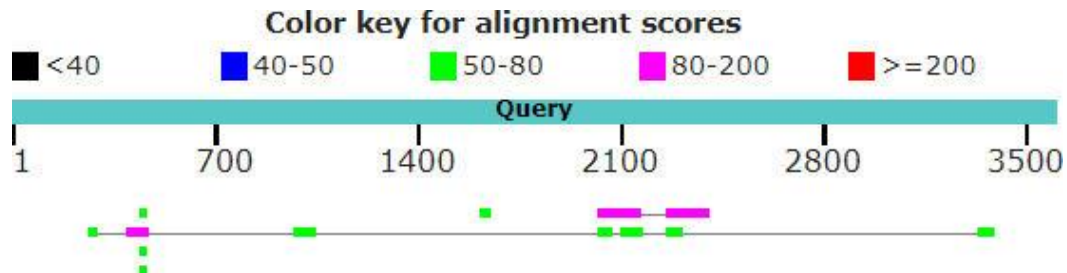

## CLUSTER 253

&gt;CL253Contig2 (3841-24.2-93112)

ATGCATTGACAAAGTTATTTGAATCAAATGAAGGTCAAAGGCTTTTAAACAATGCAAATTGAATCAAATAATATTC  
AAATGCATTTAACAAAGCTAATTGAATCAAATGACAGTCAAATGCATATACGTAAGCTAGTTCATTCAAATGAAAG  
TCAAGTGGATTAAACAAAGTTAAATAAACCTAATGACAGTCAAAAACCTTTCAAACAAACCTTATTAAATCAAATGA  
AAATCAATCACATTTAAACAAAGCTAATTAAGCCAAATAAAAGTCAAACACATCCACACAAAGCTACATGAATCAA  
ATGAAAGTGAAATGCATTCTACAAAGCTAATTAAATCAAATAAAAGTTAAATGCGTTAAACAAAGCTAATTGAATC  
CAATGAAAGCAAATGCAATCAAACAAAGCTAATTGAATCCAATAAAACTAAAATGCTTCCAACAAAGCTAATTGAA  
TCAAATATAAGTAAAGAACATTTAACAAACCTAATTGAACCAAAAGAAAATCAAACACATCCAAGCAAAGTTAATT  
GAATTAATAAAAGTCAAATGCATTCAACAAAGTTAGTTGAATCAAATGAAGGTCACATGCTTTAAACAACGCTAA  
TTAATCAAATGATATTCAAATGCATTCAACAAAGCTAATTGAATCAAATGACTGTCAAATGCATTTACGTAAGCTA  
ATTCACTCAAATGAAAGTCAAGTAAATTAACAAAGCTAACTGAATCAAATGAAAGTCAAATACATCCACACAAAG  
CTAAATTAATCAAGTGAAAATAAAACACATTCAAACAAAGCTCACTGAATCAAATGAAAGTAAAATGCATTCAACA  
AAGCTAATCGAATCAAATGAAAGTCAAACACATCCACACAAAGTTTAATAAATCAAATAAAAATCAAACACATTTA  
AACAAAGCTAATTGAATCAAGTGAAAGTCAAACACAATCCCAAAAAGCTAAATGAATCATATGAAAGTCAAATGTT  
TTCAACAAAGATAATTGAATCAAATGAAATTCAAATGCATTCAACAAATCTAATTGAGTCGAATAAAAGTCAAGCA  
CATCCAATGAAATCTTAATGAATCAAATGAAAATCAAATGTATTCAACAAATTTAATTAAGTCAAATGAAAGTAAAT  
TGCTTTCAACAAAGCTAATTGAATTAATGAAAGTCAAATGGATTCAATAAAGCAATTGAATCAAATGAAAATCAA  
ACACGTTCAAACAAAGCTAATTGTATCAAATAAAATTTCAAACACTTCCAACAAAGCTAATTGAATCAAATGAAAGT  
AAAATGCGCTCAAAATCTATTTGAATTAATTGAAAATCAATCATATTAATATATAGAGAATTGAATCAAATAGAAAT  
CAAATGCATTAAACAAAGTTAGTTGAACCAAATGAAGATCAAATGTTTTCACAAAGCTAATAGAATAAAATGATAT  
TCAAATGCATTCAACAAGGCAAATTGAATCAAATGGAAGTGAAATCCATTTAACATAGCTAATTAACGTAAACGAA  
ATTCAAATGCAAATAATAAAGCTAATTGAATCAAATGAAAGTCAAATGCATTTAACAAAGCTAACTGAATCAAATG  
GAAGCCAAATGTTTTGACAAAGCTAATGGAATCAAATGAAAGTGAAATGCATTCAACAAAGCTAATTGAACCAA  
ATGAAAGTCAAATGCGTTAAAAAAGCTAATTGAATCAAATGAAAGAAAATGCATTCAAGCAAAGCTAATTGAAT  
CAAATAAAATTAATAATGCTTCCAACAAAGCGAATTGAGTCAAAGAAAATCAAACACATCCAACAAAGCTATGA  
ATGAAATAGAGATTAAATGCAGTCAACAAAGTTATTTGAATCAAATGAAGGTCAAAGGCTTTTAAACAATGCTAATT  
GAATCAAATGATATTCAAATTCATTTAACAAAGCTAATTGAATCAAATGACAGTCAAATGCATATACGTAAGCTAG  
TTCACTCAAATGAAAGTCAAGTGCATTAAACAAAGCTAAATAAACCTAATGACAGGCAAAAACCTATCAAACAAACC  
TTATTGAATCAAATGACAATCAATCACATTCAAACAAAGCTAATTGAATAAAAATAAAAATTAAATGCATTAAACAAA  
GTTAGTTAAATCAAATAAAGATCAAATGTTTTTAACCAAGCAGATTGAATCAAATGATAGTCAAATGCATTCTACAA

AGAAAATTGAATCAAGTAAAAGTAAAATGCATTTTACAAAGCTAATACACTTAAATGAAAGTAAAAAGCATTTAAC  
 ATAGCTAATTAAATCAAATGAAAGTCAAATGCATTCGACAAAGCTAACTGAATCTAATTAGGGTAAAAACACATCTA  
 AACAAAGCTAATTGTATCAAATGCATTCAACAAAGTTAATTGAATCAAATGAAAGTGAAATGCATTCAAACAAACC  
 TAATTGAATCCAATGAAATTCAAACAAATTCAAACAAAGCTTATTGAATTAAATGAAAGTCAAATGCATTCGGAAA  
 AGTTAATTGATTCAAATAAAAGTGAGATGCATTCAACAAATGTAATTGAATTAACCGAAGGTCAAACACATTCTAA  
 CACAGCTTACTGAATCAAATGAAAGTCCAACACATTCAAACAAAGCTAATAGAATCAAATGACAATCAAATGAATT  
 CAACAAAGAAAATTCAGTCTAATGTAAGTCAAATGCATTAAAAAAAAGCTAAATGAATTCAATGATAGTCAAACAC  
 ATTCAAACAATGCTATTTGAATCAAATAAACTCAAACGCTTCCAACAAAGCTAATAGAATCAAATGAAAGTAAAA  
 TGCCTCAAAAACTATTTGGATCAAATGAAAATCAAATGCATTGAACAAAGTTAGTTGAATCAAATGATGGTCAAA  
 TGCTTTTCACAAAGTTAATTAAATAAAATGAAAGTGAAATGTATTTAACAAAGCTAATTAAATCAAATAAAAGTCA  
 AATGCATTCAACAAAGCTAAATAAATCAAATAAAAGTAAACGCATTTAAAGAAAGCTAATTAAATCAAATAAAAG  
 TGAAATGTTTTCGACAAAGCTAACTGAATTAAATAAAAGTGAAATGCGTTTAGCAAAGCTAATTGAATGAAATAAA  
 AGTCAGATGCATTCAACAAAGCTAGTTAAATCAAATGAAAGTCAAACACATTCAAACAAAGCTAATAGAGTCAAAT  
 AAAAGTCAAATGTATTTAAGAAATCTAATTAAATCAAATGATAGTCAAAAACATTCAAACAAAGATAATTTAATCA  
 AAAGAAATTTAAATGCATTCAACACATCTAATTCAACCAAATGAAAATCAAACAGATTCAAACAAATCTAATTGAAT  
 CAAATAAAATTTAAATGCTTCCAACAAAGCTAATTGAATCAAATGAAAGTCAAATGCATATACGTAAGCTAGTTCA  
 CTCAAATGAAAGTCAAGTGCATTAAACAAAGCTAAATAAACCTAATGACTGTAAAAAACTTTCAAAAAACCTTA  
 TTAAATCAAATGAAAATCAATCACATTTAAACAAAGCTAATTAAGCCAAATAAAAGTCAAACACATCCACACAAAG  
 CTACATGAATCAAATGAAAGTGAAATGCATTCAACAAAGATAATTAATCAAATGAAAGTCAAATGCATTCAACAA  
 AGCTATTTGAGTCGAATAAATGTCAAGCACATCTAATAAAAGCTTAATGAATCAAATAAAAAATCAAACACATTCAA  
 ATTAAGCTAATTGAATCAAATGAAAGTTAAATGCATTCAACAAAGCTAATTGAATCAAATGAAAGTCAACCACATC  
 CACACAAAGCTAAATGAATCAAATAAAAGGCAAATATA

Table of detected monomers

| Indices    | Period<br>Size | Copy<br>Number | Consensus<br>Size | Percent<br>Matches | Percent<br>Indels | Score | A  | C  | G  | T  | Entropy<br>(0-2) |
|------------|----------------|----------------|-------------------|--------------------|-------------------|-------|----|----|----|----|------------------|
| 1--3838    | 39             | 98.1           | 39                | 72                 | 7                 | 2113  | 49 | 14 | 11 | 24 | 1.77             |
| 162--281   | 40             | 3.0            | 40                | 73                 | 8                 | 100   | 53 | 17 | 5  | 23 | 1.65             |
| 1--3838    | 78             | 49.0           | 78                | 73                 | 7                 | 2408  | 49 | 14 | 11 | 24 | 1.77             |
| 60--3838   | 235            | 16.1           | 235               | 71                 | 9                 | 1017  | 49 | 14 | 11 | 24 | 1.77             |
| 2375--2816 | 158            | 2.8            | 155               | 77                 | 8                 | 399   | 48 | 15 | 11 | 23 | 1.78             |

Consensus pattern (39 bp):

ATGCATTTAACAAAGCTAATTGAATCAAATGAAAGTCAA

Consensus pattern (40 bp):

TTAAACAAACCTAATTAAACCAATAAAAGTCAAACACAT

Consensus pattern (78 bp):

ATGCATTCAACAAAGCTAATTGAATCAAATGAAAGTCAAATGCATTCAACAAAGCTAATTGAATCAAATGAAAGTCAA

Consensus 235:

TGAATCAAATAAAAGTCAAATGCATTCAACAAAGCTAATTAAATCAAATAAAAGTCAAATGCGTTAAACAAAGCTAATTGAATCAAATGAAAGCAAATGCAATCAAACAAAGCTAATTGAATCAAATAAAACTAAAAATGCTTCAACAAAGCTAATTCAATCAAATGAAAGTAAAGTAACATTTAACAAAGCTAATTGAACCAAAGAAAGTCAAACACATCCACACAAAGCTACA

Consensus pattern (155 bp):

TCAAATGCATTCAACAAAGCTAATTGAATTAATGAAGTCAAACACATTCAAACAAGCTTATTGAA  
TCAAATGAAACTCAAACACATTCAAACAAAGCTAATAGAATCAAATGAAAGTCAAATGAATTCGA  
AAAAGAAAATTCAGTCAAATAAAAG

BLAST alignments:

Beta corolliflora minisatellite DNA, clone pBC1447 Sequence ID: [AJ288880.1](#)

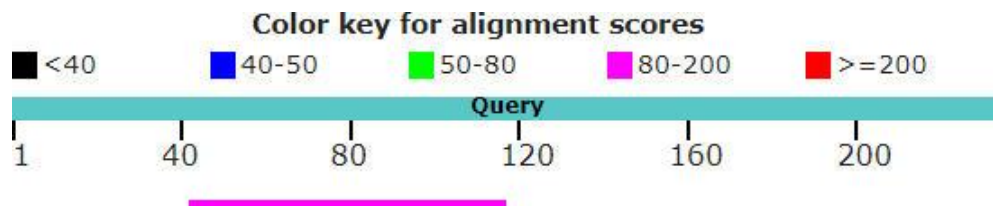

Supplement: s1 [file s1]
