# Supplementary material for: Natural History of a Satellite DNA Family: From the Ancestral Genome Component to Species-Specific Sequences, Concerted and Non-Concerted Evolution
Source: MDPI journal article supplement (doi:10.3390/ijms20051201), 2019-03-09

## Supplementary data 5

Chromosomal distribution CficCl-61-40 satDNA family sequences. CficCl-61-40 is labelled red; *C. acuminatum*-specific HOR unit CacuCl-1-117 of 117 bp is labelled green.

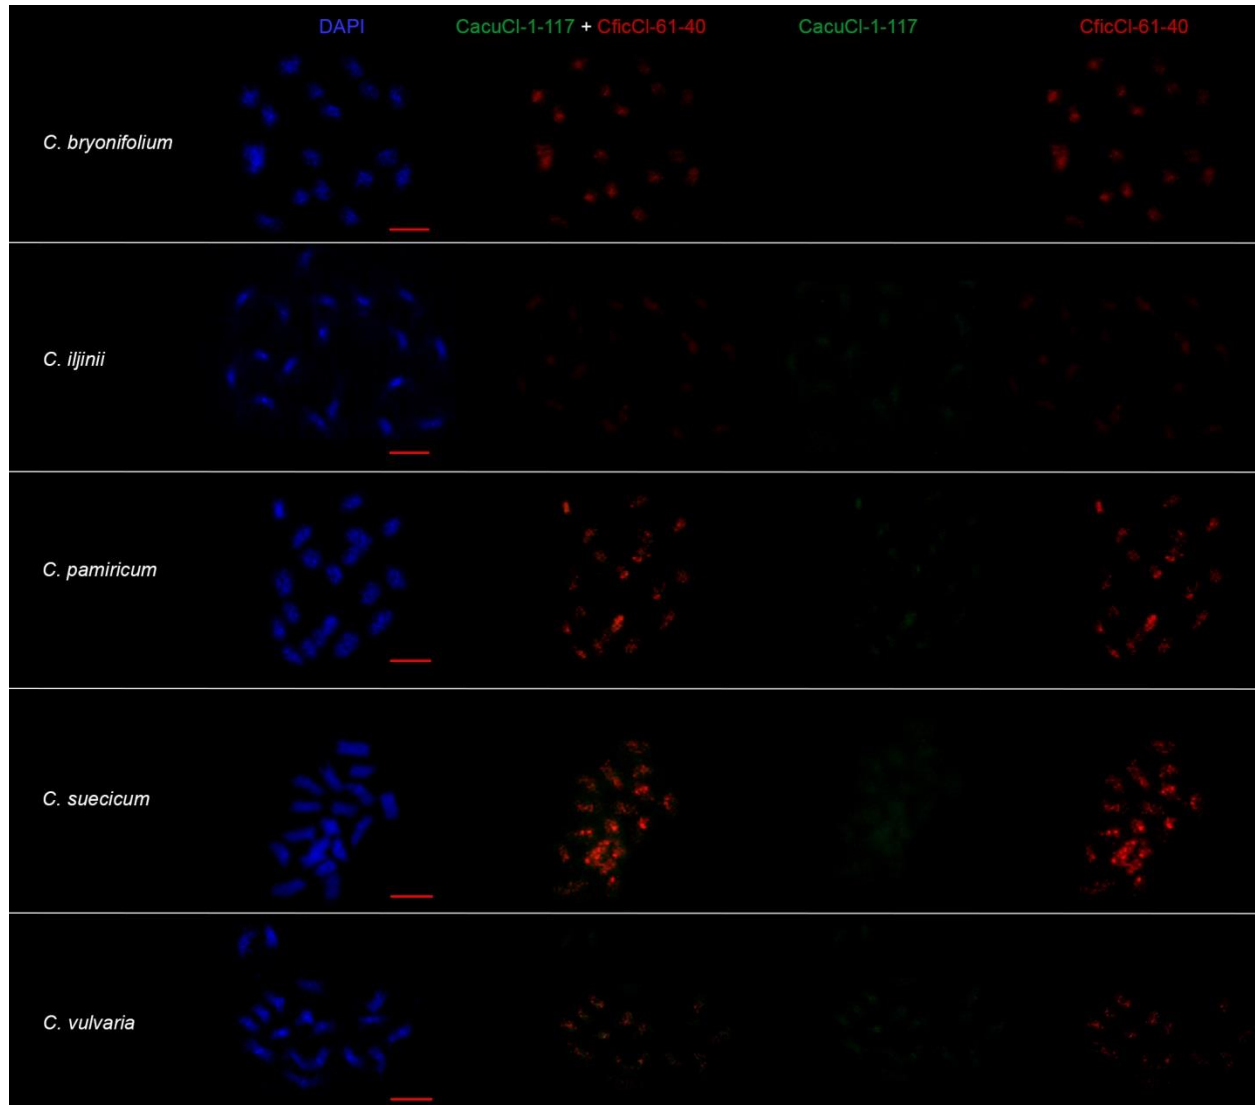

Supplement: s1 [file s1]
