# Supplementary material for: Natural History of a Satellite DNA Family: From the Ancestral Genome Component to Species-Specific Sequences, Concerted and Non-Concerted Evolution
Source: MDPI journal article supplement (doi:10.3390/ijms20051201), 2019-03-09
Supplement: s1 [file s1]

### Supplementary data 3.

Repetitive elements selected for sequence characterization and in situ hybridization.  
Information on the source *Chenopodium* species, primer sequences used for amplification, annealing temperature (Ta) and number of sequenced clones is provided.

| Repeat             | Species              | Primers                                                    | Ta (°C) | No of clones |
|--------------------|----------------------|------------------------------------------------------------|---------|--------------|
| CficCl-61-40       | <i>C. ficifolium</i> | F: TCAAACAAAGCTTTTGAATC<br>R: TTGTTTGAATGTGTTTGACTTT       | 50°     | 10           |
| Proposed HOR units |                      |                                                            |         |              |
| CacuCl-1-117       | <i>C. acuminatum</i> | F: TCACGAAGCTTTGTTTGAATG<br>R: TGATTCAAATGAATGTCAAATGC     | 50°     | 8            |
| CvulCl-28-118      | <i>C. vulvaria</i>   | F: TCAAATGAAAGTCAAAATCATTCA<br>R: TCATTTGATTTCGATTAGCTTTGT | 60°     | 5            |
| CvulCl-28-397      | <i>C. vulvaria</i>   | F: TCAAGGACATTCAACCAAAGC<br>R: TGAACGCATTTGACTTTCAGTT      | 56°     | 5            |
| CvulCl-112-117     | <i>C. vulvaria</i>   | F: CAATTAGCTTTGTTGAATGTGTTTG<br>R: TGAATCAAATGAAAGTCAAATGC | 62°     | 5            |
| CvulCl-134-117     | <i>C. vulvaria</i>   | F: TTGAATCAAATGAAAGTCAAACG<br>R: TCAATTAGCTTTGTTGGAATGC    | 60°     | 3            |
| Cvul-145-129       | <i>C. vulvaria</i>   | F: CAAATCAAATGAACTCAAATGC<br>R: TGTTTGAATGTGTTTGAATGTGTT   | 56°     | 9            |
