# Supplementary material for: Natural History of a Satellite DNA Family: From the Ancestral Genome Component to Species-Specific Sequences, Concerted and Non-Concerted Evolution
Source: MDPI journal article supplement (doi:10.3390/ijms20051201), 2019-03-09
Supplement: s1 [file s1]

### Supplementary Data 4

Pairwise comparison of sequence variation within the CficCl-61-40 (A, B), and proposed HOR units CaculCl-1-117 (C, D), CvulCl-28-118 (E, F), CvulCl-28-397 (G, H), CvulCl-112-117 (I, J), CvulCl-134-117 (K, L) and Cvul-145-129 (M, N). For these monomers the sequence alignments containing the consensus sequence reconstructed by RE and sequences obtained by cloning and sequencing of clones are presented. For the cloned sequences identities with the consensus is represented by dots, differences by the alternative nucleotide characters. Tables contain the % of sequence similarities between the different sequences.

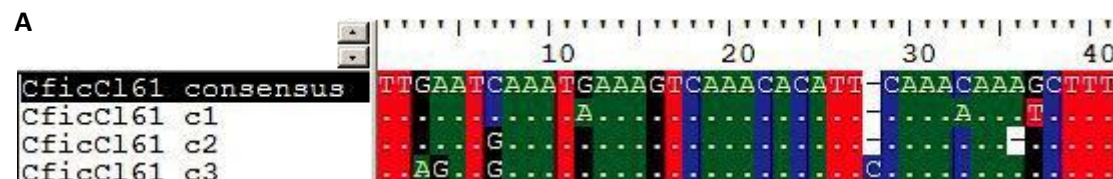

| clones             | CficCl61_consensus | CficCl61_c1 | CficCl61_c2 | CficiCl61_c3 |
|--------------------|--------------------|-------------|-------------|--------------|
| CficCl61_consensus |                    | 92.5        | 95          | 90.2         |
| CficCl61_c1        | 92.5               |             | 87.5        | 82.9         |
| CficCl61_c2        | 95                 | 87.5        |             | 90.2         |
| CficiCl61_c3       | 90.2               | 82.9        | 90.2        |              |

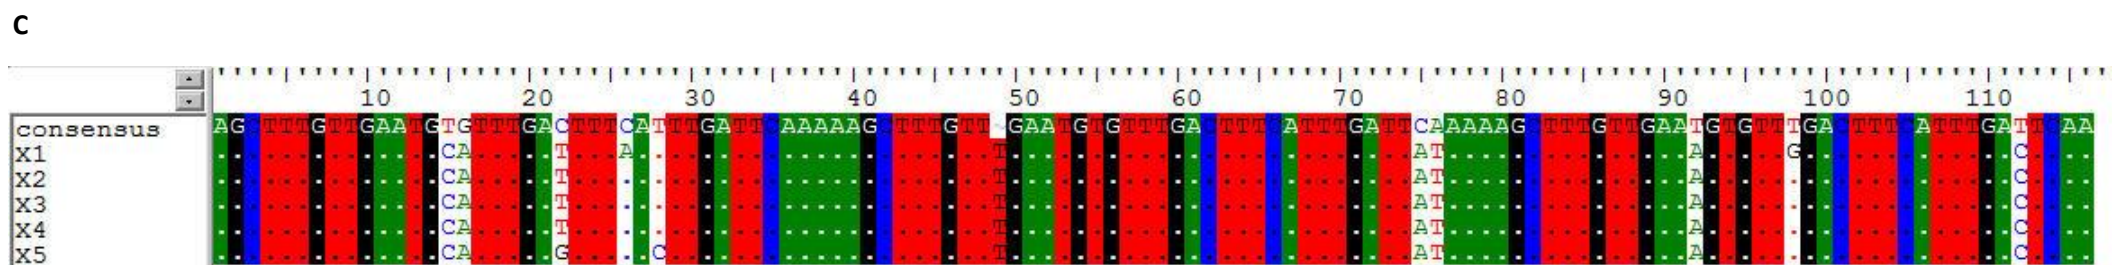

| D                 |                   |      |       |       |       |      |
|-------------------|-------------------|------|-------|-------|-------|------|
| clones            | CacuCl1_consensus | X1   | X2    | X3    | X4    | X5   |
| CacuCl1_consensus |                   | 91.3 | 93.1  | 93.1  | 93.1  | 92.2 |
| X1                | 91.3              |      | 98.2  | 98.2  | 98.2  | 96.5 |
| X2                | 93.1              | 98.2 |       | 100.0 | 100.0 | 98.2 |
| X3                | 93.1              | 98.2 | 100.0 |       | 100.0 | 98.2 |
| X4                | 93.1              | 98.2 | 100.0 | 100.0 |       | 98.2 |
| X5                | 92.2              | 96.5 | 98.2  | 98.2  | 98.2  |      |

E

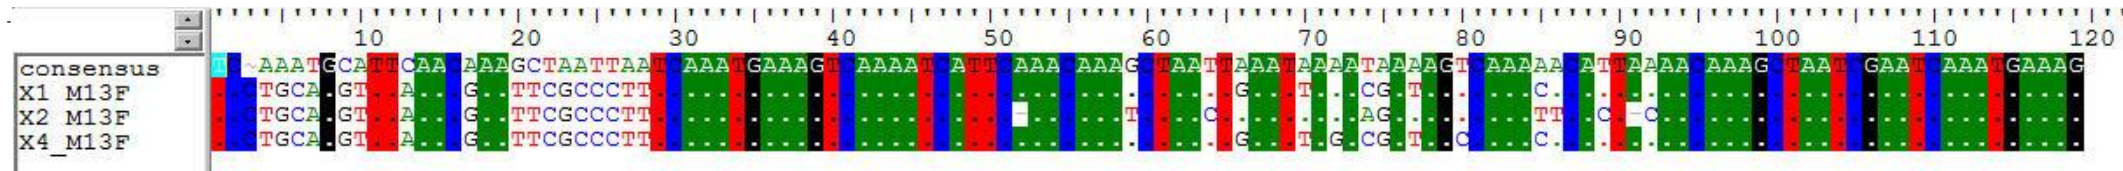

F

| clones                  | CvulCl-28-118 consensus | X1_M13F | X2_M13F | X4_M13F |
|-------------------------|-------------------------|---------|---------|---------|
| CvulCl-28-118 consensus |                         | 79.8    | 76.4    | 78.1    |
| X1_M13F                 | 79.8                    |         | 89.9    | 98.3    |
| X2_M13F                 | 76.4                    | 89.9    |         | 88.2    |
| X4_M13F                 | 78.1                    | 98.3    | 88.2    |         |

G

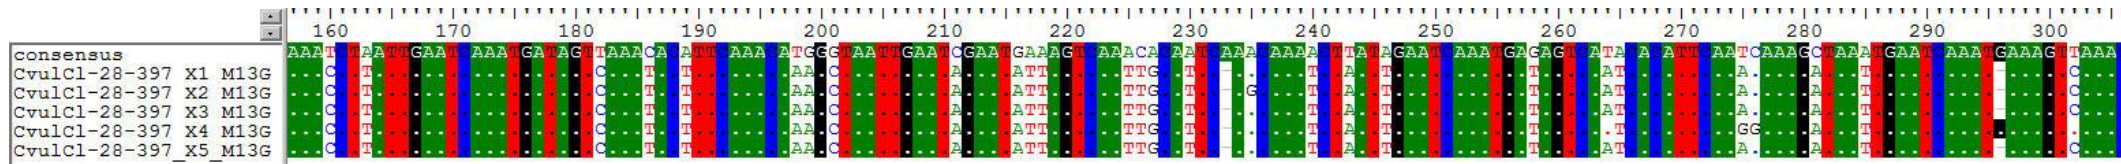

H

| clones                  | CvulCl-28-397_consensus | X1_M13G | X2_M13G | X3_M13G | X4_M13G | X5_M13G |
|-------------------------|-------------------------|---------|---------|---------|---------|---------|
| CvulCl-28-397_consensus |                         | 68.9    | 68.6    | 68.9    | 69.6    | 68.9    |
| X1_M13G                 | 68,9                    |         | 99.7    | 100.0   | 98.3    | 100.0   |
| X2_M13G                 | 68,6                    | 99.7    |         | 99.7    | 98.1    | 99.7    |
| X3_M13G                 | 68,9                    | 100.0   | 99.7    |         | 98.3    | 100.0   |
| X4_M13G                 | 69,6                    | 98.3    | 98.1    | 98.3    |         | 98.3    |
| X5_M13G                 | 69,9                    | 100.0   | 99.7    | 100.0   | 98,3    |         |

I

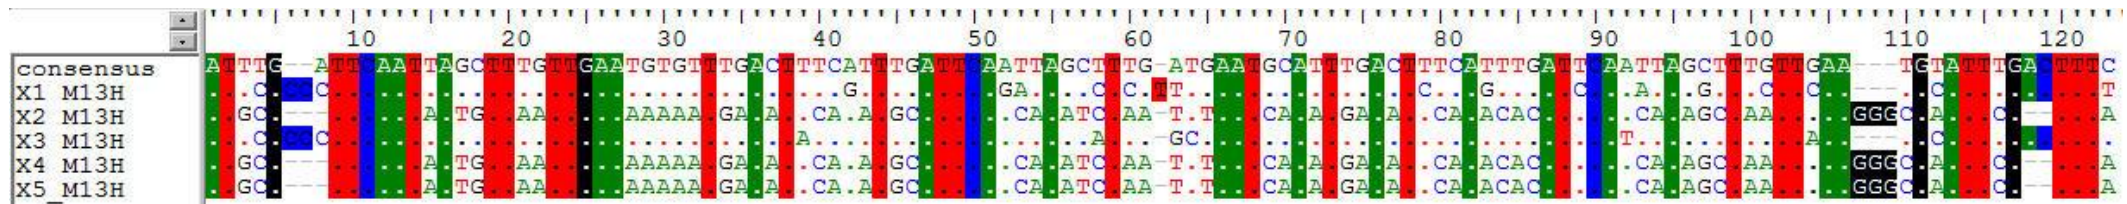

J

| clones                   | CvulCI-112-117_consensus | X1_M13H | X2_M13H | X3_M13H | X4_M13H | X5_M13H |
|--------------------------|--------------------------|---------|---------|---------|---------|---------|
| CvulCI-112-117_consensus |                          | 83.3    | 51.6    | 90.7    | 51.6    | 51.6    |
| X1_M13H                  | 83.3                     |         | 49.5    | 85.0    | 49.5    | 49.5    |
| X2_M13H                  | 51.6                     | 49.5    |         | 48.3    | 100.0   | 100.0   |
| X3_M13H                  | 90.7                     | 85.0    | 48.3    |         | 48.3    | 48.3    |
| X4_M13H                  | 51.6                     | 49.5    | 100.0   | 48.3    |         | 100.0   |
| X5_M13H                  | 51.6                     | 49.5    | 100.0   | 48.3    | 100.0   |         |

K

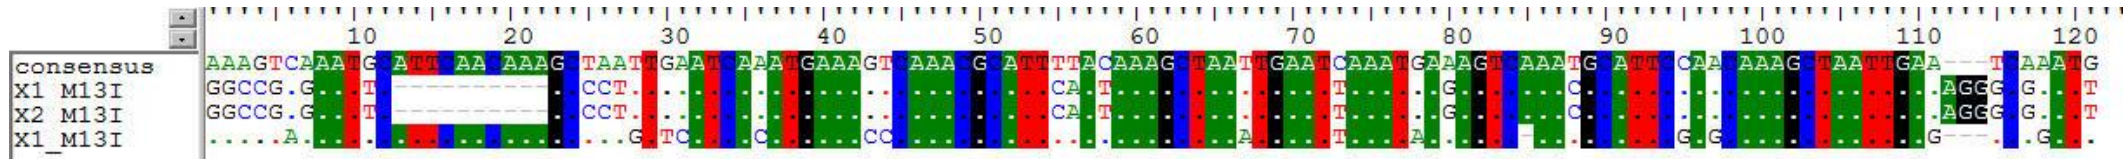

L

| clones                   | CvulCI-134-117_consensus | X1_M13I | X2_M13I | X3_M13I |
|--------------------------|--------------------------|---------|---------|---------|
| CvulCI-134-117_consensus |                          | 73.5    | 73.5    | 87.2    |
| X1_M13I                  | 73.5                     |         | 100.0   | 62.8    |
| X2_M13I                  | 73.5                     | 100.0   |         | 62.8    |
| X3_M13I                  | 87.2                     | 62.8    | 62.8    |         |

M

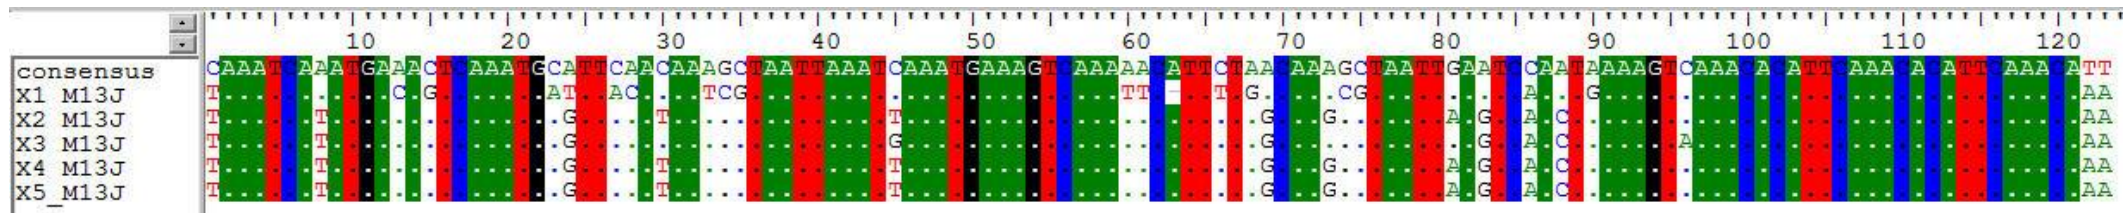

N

| clones | Cvul-145-129_consensus | X1_M13J | X2_M13J | X3_M13J | X4_M13J | X5_M13J |
|--------|------------------------|---------|---------|---------|---------|---------|
|--------|------------------------|---------|---------|---------|---------|---------|

|                        |      |      |       |      |       |       |
|------------------------|------|------|-------|------|-------|-------|
| Cvul-145-129_consensus |      | 82.9 | 89.4  | 91.0 | 89.4  | 89.4  |
| X1_M13J                | 82.9 |      | 79.6  | 81.3 | 79.6  | 79.6  |
| X2_M13J                | 89.4 | 79.6 |       | 95.9 | 100.0 | 100.0 |
| X3_M13J                | 91.0 | 81.3 | 95.9  |      | 95.9  | 95.9  |
| X4_M13J                | 89.4 | 79.6 | 100.0 | 95.9 |       | 100.0 |
| X5_M13J                | 89.4 | 79.6 | 100.0 | 95.9 | 100.0 |       |
