# Supplementary material for: Natural History of a Satellite DNA Family: From the Ancestral Genome Component to Species-Specific Sequences, Concerted and Non-Concerted Evolution
Source: Int J Mol Sci. 2019 Mar 9;20(5):1201. doi: 10.3390/ijms20051201 (PMC6429384; doi:10.3390/ijms20051201)
Supplement: Supplementary file 1 [file ijms-20-01201-s001.zip]

Archive with 5 entries (5 files):
- suppl_Data-1.pdf
- suppl_Data-2.pdf
- suppl_Data-3.pdf
- suppl_Data-4.pdf
- suppl_Data-5.pdf
